# Supplementary material for: Survival outcome and prognostic factors of patients with nasopharyngeal cancer in Yogyakarta, Indonesia: A hospital-based retrospective study
Source: PLoS One. 2021 Feb 12;16(2):e0246638. doi: 10.1371/journal.pone.0246638 (PMC7880494; doi:10.1371/journal.pone.0246638)
Supplement: S1 Data — (XLSX) [file pone.0246638.s003.xlsx]

## Sheet: Figure 1
months	survival
0.0985626	1
0.131417	1
0.164271	1
0.197125	1
0.229979	1
0.262834	1
0.295688	1
0.361396	1
0.394251	1
0.427105	0.9986
0.459959	0.9986
0.492813	0.9972
0.525667	0.9958
0.558522	0.9958
0.591376	0.9958
0.62423	0.9958
0.657084	0.993
0.722793	0.993
0.755647	0.9901
0.788501	0.9901
0.821355	0.9901
0.854209	0.9887
0.887064	0.9887
0.919918	0.9857
0.952772	0.9827
1.01848	0.9813
1.05133	0.9813
1.08419	0.9813
1.11704	0.9798
1.1499	0.9798
1.18275	0.9783
1.21561	0.9783
1.31417	0.9768
1.41273	0.9768
1.44559	0.9768
1.47844	0.9768
1.51129	0.9752
1.54415	0.9752
1.577	0.9737
1.60986	0.9737
1.67556	0.9737
1.74127	0.9722
1.77413	0.9722
1.83984	0.9722
1.87269	0.9722
1.90554	0.9706
1.97125	0.9706
2.00411	0.9691
2.06982	0.9691
2.10267	0.9691
2.16838	0.9691
2.20123	0.9675
2.26694	0.9659
2.29979	0.9644
2.33265	0.9628
2.3655	0.9628
2.39836	0.9628
2.43121	0.9612
2.46407	0.9597
2.49692	0.9581
2.52977	0.9565
2.56263	0.9565
2.59548	0.9565
2.62834	0.9549
2.7269	0.9549
2.75975	0.9549
2.79261	0.9533
2.85832	0.9533
2.89117	0.9533
2.98973	0.9533
3.02259	0.9517
3.05544	0.9485
3.0883	0.9469
3.12115	0.9453
3.154	0.9436
3.18686	0.942
3.21971	0.9388
3.25257	0.9388
3.35113	0.9372
3.38398	0.9356
3.41684	0.9356
3.44969	0.9339
3.48255	0.9339
3.5154	0.9323
3.54825	0.9323
3.71253	0.9323
3.74538	0.9307
3.77823	0.9274
3.81109	0.9258
3.8768	0.9241
3.90965	0.9241
3.97536	0.9225
4.00821	0.9225
4.10678	0.9208
4.13963	0.9192
4.20534	0.9192
4.23819	0.9192
4.3039	0.9175
4.36961	0.9175
4.40246	0.9159
4.56674	0.9159
4.59959	0.9142
4.63244	0.9142
4.6653	0.9142
4.73101	0.9126
4.76386	0.9126
4.79671	0.9126
4.86242	0.9126
4.89528	0.9109
4.99384	0.9109
5.02669	0.9092
5.05955	0.9058
5.0924	0.9042
5.19097	0.9025
5.22382	0.9025
5.25667	0.9025
5.28953	0.9025
5.35524	0.9025
5.38809	0.9008
5.4538	0.8991
5.48665	0.8974
5.58522	0.8974
5.61807	0.8974
5.65092	0.8974
5.68378	0.8974
5.71663	0.8957
5.84805	0.8922
5.94661	0.8905
6.01232	0.8888
6.07803	0.887
6.14374	0.887
6.20945	0.887
6.27515	0.8853
6.30801	0.8836
6.34086	0.8818
6.37372	0.8818
6.47228	0.8801
6.50513	0.8801
6.6037	0.8783
6.63655	0.8783
6.6694	0.8766
6.83368	0.8766
6.86653	0.8766
6.99795	0.8748
7.16222	0.873
7.29363	0.8713
7.35934	0.8713
7.3922	0.8695
7.45791	0.8677
7.49076	0.8642
7.58932	0.8624
7.62218	0.8606
7.65503	0.8606
7.72074	0.8606
7.78645	0.8588
7.8193	0.857
7.85216	0.8552
7.98357	0.8535
8.01643	0.8517
8.04928	0.8481
8.24641	0.8463
8.27926	0.8463
8.31211	0.8445
8.41068	0.8445
8.73922	0.8445
8.90349	0.8391
8.93634	0.8372
9.00205	0.8354
9.03491	0.8354
9.06776	0.8354
9.10062	0.8336
9.19918	0.8318
9.23203	0.8318
9.26489	0.83
9.46201	0.8245
9.49487	0.8245
9.56057	0.8245
9.62628	0.8226
9.69199	0.8208
9.7577	0.819
9.79055	0.8171
10.0205	0.8153
10.0862	0.8135
10.2177	0.8098
10.2505	0.8079
10.2834	0.8079
10.4805	0.806
10.5791	0.8042
10.6448	0.8023
10.6776	0.8004
10.7433	0.8004
10.7762	0.7986
10.9076	0.7986
11.039	0.7967
11.0719	0.7967
11.1704	0.7967
11.2361	0.7948
11.4333	0.7929
11.4661	0.7929
11.499	0.7929
11.5647	0.791
11.6632	0.791
11.729	0.7891
11.8275	0.7891
11.8932	0.7891
11.9918	0.7872
12.1561	0.7872
12.1889	0.7853
12.2546	0.7853
12.2875	0.7853
12.4517	0.7834
12.5503	0.7834
12.6489	0.7814
12.6817	0.7795
12.7146	0.7795
12.846	0.7795
12.8789	0.7795
13.0103	0.7776
13.2074	0.7756
13.2731	0.7736
13.4045	0.7717
13.4374	0.7717
13.6016	0.7717
13.6674	0.7697
13.8973	0.7658
13.963	0.7658
14.0287	0.7658
14.0616	0.7658
14.0945	0.7638
14.1602	0.7618
14.2259	0.7578
14.3573	0.7578
14.3901	0.7558
14.4887	0.7538
14.5544	0.7538
14.5873	0.7518
14.6201	0.7518
14.653	0.7498
14.7187	0.7478
14.7844	0.7458
14.8501	0.7438
14.883	0.7418
14.9158	0.7398
14.9487	0.7398
14.9815	0.7377
15.0144	0.7357
15.0801	0.7337
15.1129	0.7337
15.1786	0.7317
15.2772	0.7296
15.3101	0.7276
15.4743	0.7255
15.54	0.7235
15.5729	0.7235
15.7043	0.7194
15.7372	0.7153
15.8029	0.7132
15.8357	0.7132
15.9014	0.7132
16.0329	0.7112
16.1314	0.7112
16.1971	0.7091
16.3614	0.707
16.5585	0.705
16.6899	0.7029
16.7556	0.7008
16.7885	0.7008
16.8542	0.7008
17.0185	0.6987
17.117	0.6966
17.1828	0.6966
17.2156	0.6966
17.2813	0.6966
17.3142	0.6945
17.3799	0.6924
17.4456	0.6924
17.4784	0.6903
17.5113	0.6882
17.7413	0.6818
17.8727	0.6797
17.9384	0.6797
18.1027	0.6797
18.1355	0.6797
18.2012	0.6754
18.2341	0.6732
18.3326	0.6711
18.3984	0.6689
18.4969	0.6689
18.5298	0.6689
18.5626	0.6667
18.5955	0.6667
18.6612	0.6624
18.924	0.6624
18.9569	0.658
19.2526	0.658
19.5483	0.658
19.5811	0.658
19.7454	0.6558
19.8439	0.6536
19.9754	0.6536
20.0082	0.6514
20.1068	0.6514
20.2382	0.6514
20.271	0.6492
20.3039	0.6492
20.3696	0.6492
20.4025	0.6469
20.4682	0.6424
20.7639	0.6424
20.9938	0.6401
21.0267	0.6378
21.0595	0.6378
21.1581	0.6355
21.191	0.6355
21.2567	0.6332
21.2895	0.6309
21.3224	0.6286
21.4867	0.6263
21.5195	0.6263
21.5524	0.6263
21.7166	0.6263
21.8809	0.6263
21.9466	0.6239
22.078	0.6216
22.1766	0.6192
22.5051	0.6169
22.6037	0.6169
22.7023	0.6169
22.8008	0.6121
22.8994	0.6097
22.9979	0.6074
23.0965	0.605
23.1622	0.605
23.1951	0.6026
23.3922	0.6026
23.4908	0.6002
23.5565	0.5977
23.6879	0.5977
23.7207	0.5977
23.7536	0.5953
23.7864	0.5929
23.9507	0.588
24.115	0.5855
24.1807	0.5855
24.6407	0.5855
24.7392	0.583
24.8049	0.583
24.8378	0.5806
24.9692	0.5806
25.1006	0.5756
25.1992	0.5756
25.232	0.5756
25.3306	0.5756
25.462	0.5756
25.5934	0.573
25.6591	0.5705
25.7577	0.5705
25.7906	0.5679
26.0862	0.5679
26.1191	0.5654
26.2177	0.5654
26.2505	0.5654
26.2834	0.5628
26.3162	0.5628
26.3819	0.5628
26.4148	0.5628
26.5133	0.5628
26.5462	0.5601
26.7762	0.5574
26.8419	0.5548
26.9733	0.5521
27.1047	0.5521
27.2361	0.5521
27.269	0.5521
27.3018	0.5493
27.3347	0.5465
27.3676	0.5465
27.4004	0.5465
27.4661	0.5437
27.5647	0.5409
27.6304	0.5381
27.6632	0.5381
27.6961	0.5352
27.729	0.5324
27.8932	0.5324
27.9261	0.5324
27.9589	0.5324
28.2875	0.5324
28.3532	0.5324
28.4517	0.5324
28.6817	0.5324
28.8131	0.5324
28.9117	0.5324
29.076	0.5294
29.1745	0.5263
29.306	0.5232
29.5031	0.5232
29.5359	0.5232
29.5688	0.5232
29.8316	0.5201
29.8973	0.5201
30.0616	0.517
30.1273	0.517
30.193	0.5138
30.2587	0.5106
30.423	0.5106
30.4887	0.5074
30.6201	0.5042
30.7844	0.501
30.8172	0.501
30.883	0.501
31.0472	0.501
31.0801	0.4978
31.2115	0.4978
31.2772	0.4978
31.54	0.4945
31.5729	0.4912
31.8686	0.4912
31.9014	0.4912
32.1643	0.4912
32.23	0.4878
32.3943	0.4844
32.46	0.4844
32.5257	0.4844
32.5585	0.481
32.6571	0.481
32.7885	0.481
32.8214	0.481
33.0185	0.481
33.2485	0.4774
33.3799	0.4774
33.4127	0.4774
33.5113	0.4774
33.9713	0.4774
34.0041	0.4737
34.1027	0.4737
34.2998	0.4737
34.6612	0.4737
34.7926	0.4737
34.8255	0.4699
35.5154	0.4699
35.9754	0.4699
36.4682	0.4699
36.6653	0.4699
36.7639	0.4699
37.1581	0.4699
37.2238	0.4699
37.5195	0.4699
37.5852	0.4658
37.6181	0.4658
37.848	0.4616
38.5708	0.4616
38.8337	0.4616
39.2608	0.4616
39.4579	0.4616
39.5893	0.4573
40.5421	0.4573
40.9035	0.4573
40.9692	0.4573
41.1335	0.4573
41.1663	0.4573
41.4292	0.4527
41.5606	0.4527
42.0534	0.4527
42.2505	0.4527
42.2834	0.4527
42.5133	0.4527
42.9076	0.4527
42.9733	0.4527
43.3347	0.4527
43.4333	0.4527
43.7618	0.4476
43.9918	0.4476
44.2218	0.4476
44.7803	0.4476
45.2402	0.4424
45.7002	0.4424
45.7659	0.4424
45.8316	0.4424
45.9302	0.437
45.963	0.437
46.423	0.437
46.9487	0.437
47.77	0.437
48.1314	0.437
48.6242	0.437
48.7228	0.437
48.9528	0.437
49.4784	0.437
49.7413	0.437
49.9713	0.437
50.1355	0.437

## Sheet: Figure 2A
Over median age			Under median age
months	survival		months	survival
0.0985626	1		0.131417	1
0.131417	1		0.164271	1
0.164271	1		0.197125	1
0.197125	1		0.229979	1
0.229979	1		0.262834	1
0.262834	1		0.295688	1
0.295688	1		0.361396	1
0.361396	1		0.394251	1
0.394251	1		0.427105	1
0.427105	0.9973		0.459959	1
0.459959	0.9973		0.492813	1
0.492813	0.9946		0.525667	0.9971
0.525667	0.9946		0.558522	0.9971
0.591376	0.9946		0.62423	0.9971
0.62423	0.9946		0.657084	0.9913
0.657084	0.9946		0.755647	0.9854
0.722793	0.9946		0.788501	0.9854
0.755647	0.9946		0.854209	0.9825
0.788501	0.9946		0.887064	0.9825
0.821355	0.9946		0.919918	0.9795
0.854209	0.9946		0.952772	0.9735
0.887064	0.9946		1.01848	0.9705
0.919918	0.9917		1.05133	0.9705
0.952772	0.9917		1.11704	0.9674
1.08419	0.9917		1.31417	0.9644
1.11704	0.9917		1.41273	0.9644
1.1499	0.9917		1.44559	0.9644
1.18275	0.9887		1.577	0.9613
1.21561	0.9887		1.60986	0.9613
1.47844	0.9887		1.67556	0.9613
1.51129	0.9857		1.77413	0.9613
1.54415	0.9857		1.83984	0.9613
1.577	0.9857		1.90554	0.9582
1.60986	0.9857		1.97125	0.9582
1.74127	0.9827		2.00411	0.955
1.87269	0.9827		2.10267	0.955
1.97125	0.9827		2.16838	0.955
2.06982	0.9827		2.20123	0.9518
2.10267	0.9827		2.26694	0.9486
2.26694	0.9827		2.3655	0.9486
2.29979	0.9796		2.39836	0.9486
2.33265	0.9765		2.46407	0.9486
2.43121	0.9735		2.49692	0.9454
2.46407	0.9704		2.52977	0.9422
2.56263	0.9704		2.59548	0.9422
2.59548	0.9704		2.62834	0.9389
2.7269	0.9704		2.7269	0.9389
2.75975	0.9704		2.79261	0.9356
2.85832	0.9704		2.85832	0.9356
3.0883	0.9672		2.89117	0.9356
3.12115	0.9672		2.98973	0.9356
3.21971	0.9641		3.02259	0.9323
3.48255	0.9641		3.05544	0.9257
3.5154	0.9609		3.12115	0.9223
3.71253	0.9609		3.154	0.919
3.77823	0.9578		3.18686	0.9157
3.8768	0.9546		3.21971	0.9124
4.00821	0.9546		3.25257	0.9124
4.13963	0.9514		3.35113	0.909
4.20534	0.9514		3.38398	0.9057
4.23819	0.9514		3.41684	0.9057
4.40246	0.9482		3.44969	0.9023
4.63244	0.9482		3.54825	0.9023
4.73101	0.9449		3.74538	0.8989
4.89528	0.9417		3.77823	0.8955
4.99384	0.9417		3.81109	0.8922
5.02669	0.9384		3.90965	0.8922
5.05955	0.9352		3.97536	0.8888
5.28953	0.9352		4.10678	0.8854
5.35524	0.9352		4.3039	0.882
5.38809	0.9319		4.36961	0.882
5.4538	0.9286		4.56674	0.882
5.48665	0.9253		4.59959	0.8786
5.65092	0.9253		4.6653	0.8786
5.68378	0.9253		4.76386	0.8786
5.71663	0.922		4.79671	0.8786
5.94661	0.9186		4.86242	0.8786
6.14374	0.9186		5.05955	0.8751
6.20945	0.9186		5.0924	0.8716
6.27515	0.9153		5.19097	0.8682
6.30801	0.9153		5.22382	0.8682
6.34086	0.9119		5.25667	0.8682
6.37372	0.9119		5.58522	0.8682
6.47228	0.9085		5.61807	0.8682
6.50513	0.9085		5.68378	0.8682
7.16222	0.9051		5.84805	0.861
7.29363	0.9017		5.94661	0.861
7.35934	0.9017		6.01232	0.8574
7.45791	0.8983		6.07803	0.8538
7.49076	0.8949		6.30801	0.8502
7.58932	0.8914		6.47228	0.8502
7.62218	0.888		6.6037	0.8466
7.8193	0.8846		6.63655	0.8466
8.01643	0.8811		6.6694	0.8429
8.04928	0.8742		6.83368	0.8429
8.27926	0.8742		6.86653	0.8429
8.90349	0.8708		6.99795	0.8393
9.03491	0.8708		7.3922	0.8356
9.06776	0.8708		7.49076	0.8319
9.26489	0.8673		7.62218	0.8319
9.7577	0.8638		7.65503	0.8319
10.0205	0.8603		7.72074	0.8319
10.0862	0.8603		7.78645	0.8282
10.2177	0.8532		7.85216	0.8244
10.2505	0.8497		7.98357	0.8207
10.4805	0.8461		8.01643	0.8207
10.6448	0.8426		8.24641	0.817
10.7762	0.839		8.31211	0.8132
11.1704	0.839		8.41068	0.8132
11.4333	0.8354		8.73922	0.8132
11.729	0.8319		8.90349	0.8056
11.8275	0.8319		8.93634	0.8018
11.8932	0.8319		9.00205	0.798
11.9918	0.8282		9.10062	0.7942
12.1889	0.8282		9.19918	0.7904
12.5503	0.8282		9.23203	0.7904
12.6817	0.8282		9.46201	0.7789
12.7146	0.8282		9.49487	0.7789
12.8789	0.8282		9.56057	0.7789
13.0103	0.8245		9.62628	0.775
13.2731	0.8245		9.69199	0.7711
13.4374	0.8245		9.79055	0.7673
13.6016	0.8245		10.0205	0.7673
13.8973	0.8208		10.0862	0.7634
14.0287	0.8208		10.2834	0.7634
14.0616	0.8208		10.5791	0.7594
14.2259	0.8132		10.6776	0.7555
14.3573	0.8132		10.7433	0.7555
14.3901	0.8094		10.9076	0.7555
14.4887	0.8056		11.039	0.7515
14.6201	0.8056		11.0719	0.7515
14.653	0.8018		11.2361	0.7475
14.7187	0.798		11.4661	0.7475
14.7844	0.7942		11.499	0.7475
14.8501	0.7904		11.5647	0.7435
14.883	0.7904		11.6632	0.7435
14.9158	0.7865		12.1561	0.7435
14.9487	0.7865		12.1889	0.7394
15.0144	0.7826		12.2546	0.7394
15.0801	0.7787		12.2875	0.7394
15.1786	0.7748		12.4517	0.7353
15.3101	0.7709		12.6489	0.7311
15.54	0.7671		12.6817	0.727
15.5729	0.7671		12.846	0.727
15.7043	0.7592		13.2074	0.7229
15.7372	0.7553		13.2731	0.7187
15.8357	0.7553		13.4045	0.7145
15.9014	0.7553		13.6674	0.7103
16.7556	0.7513		13.8973	0.7061
16.8542	0.7513		13.963	0.7061
17.117	0.7473		14.0945	0.7019
17.1828	0.7473		14.1602	0.6977
17.2156	0.7473		14.5544	0.6977
17.4456	0.7473		14.5873	0.6935
17.5113	0.7433		14.883	0.6893
18.1355	0.7433		14.9158	0.6893
18.2012	0.735		14.9815	0.685
18.2341	0.7309		15.1129	0.685
18.3326	0.7268		15.2772	0.6807
18.3984	0.7227		15.3101	0.6807
18.5298	0.7227		15.4743	0.6764
18.5955	0.7227		15.7372	0.6721
18.6612	0.7144		15.8029	0.6678
18.9569	0.7061		16.0329	0.6635
19.5811	0.7061		16.1314	0.6635
19.7454	0.7019		16.1971	0.6592
19.8439	0.6977		16.3614	0.6548
20.1068	0.6977		16.5585	0.6505
20.2382	0.6977		16.6899	0.6462
20.271	0.6934		16.7885	0.6462
20.3039	0.6934		17.0185	0.6418
20.4682	0.6934		17.2156	0.6418
20.7639	0.6934		17.2813	0.6418
21.0595	0.6934		17.3142	0.6374
21.191	0.6934		17.3799	0.6329
21.2567	0.6934		17.4784	0.6285
21.5195	0.6934		17.7413	0.6152
21.7166	0.6934		17.8727	0.6108
22.1766	0.689		17.9384	0.6108
22.5051	0.6845		18.1027	0.6108
22.7023	0.6845		18.1355	0.6108
22.8008	0.68		18.4969	0.6108
22.8994	0.6755		18.5626	0.6063
23.1622	0.6755		18.924	0.6063
23.3922	0.6755		19.2526	0.6063
23.4908	0.6708		19.5483	0.6063
23.6879	0.6708		19.8439	0.6063
23.7207	0.6708		19.9754	0.6063
23.7536	0.6661		20.0082	0.6015
23.7864	0.6661		20.3696	0.6015
23.9507	0.6614		20.4025	0.5967
24.7392	0.6566		20.4682	0.5871
24.8049	0.6566		20.9938	0.5822
25.1006	0.6518		21.0267	0.5774
25.232	0.6518		21.1581	0.5725
25.3306	0.6518		21.2567	0.5677
25.7906	0.6469		21.2895	0.5628
26.0862	0.6469		21.3224	0.558
26.1191	0.642		21.4867	0.5531
26.2505	0.642		21.5524	0.5531
26.2834	0.6371		21.8809	0.5531
26.7762	0.6321		21.9466	0.5482
26.8419	0.6321		22.078	0.5432
27.1047	0.6321		22.1766	0.5432
27.2361	0.6321		22.6037	0.5432
27.3676	0.6321		22.8008	0.5382
27.4004	0.6321		22.9979	0.5332
27.4661	0.6268		23.0965	0.5281
27.6632	0.6268		23.1951	0.5231
27.9589	0.6268		23.5565	0.5181
28.2875	0.6268		23.7864	0.5131
28.3532	0.6268		23.9507	0.508
28.8131	0.6268		24.115	0.503
28.9117	0.6268		24.1807	0.503
29.076	0.621		24.6407	0.503
29.306	0.621		24.8378	0.4979
29.5359	0.621		24.9692	0.4979
29.8316	0.6152		25.1006	0.4927
30.1273	0.6152		25.1992	0.4927
30.193	0.6092		25.462	0.4927
30.4887	0.6033		25.5934	0.4873
30.7844	0.5974		25.6591	0.482
30.8172	0.5974		25.7577	0.482
31.0472	0.5974		26.2177	0.482
31.2115	0.5974		26.3162	0.482
31.9014	0.5974		26.3819	0.482
32.1643	0.5974		26.4148	0.482
32.3943	0.5912		26.5133	0.482
32.5257	0.5912		26.5462	0.4762
32.5585	0.5849		26.8419	0.4704
32.6571	0.5849		26.9733	0.4646
32.7885	0.5849		27.269	0.4646
32.8214	0.5849		27.3018	0.4587
33.0185	0.5849		27.3347	0.4529
33.2485	0.5783		27.4661	0.4529
33.3799	0.5783		27.5647	0.4469
33.4127	0.5783		27.6304	0.4409
33.9713	0.5783		27.6961	0.4348
34.0041	0.5715		27.729	0.4288
34.1027	0.5715		27.8932	0.4288
34.2998	0.5715		27.9261	0.4288
34.6612	0.5715		27.9589	0.4288
34.7926	0.5715		28.4517	0.4288
35.5154	0.5715		28.6817	0.4288
35.9754	0.5715		29.076	0.4288
36.4682	0.5715		29.1745	0.4222
36.6653	0.5715		29.306	0.4156
36.7639	0.5715		29.5031	0.4156
37.1581	0.5715		29.5688	0.4156
37.5852	0.5638		29.8973	0.4156
37.6181	0.5638		30.0616	0.4087
37.848	0.556		30.2587	0.4017
38.5708	0.556		30.423	0.4017
39.2608	0.556		30.6201	0.3947
40.9692	0.556		30.883	0.3947
41.1335	0.556		31.0801	0.3875
41.1663	0.556		31.2772	0.3875
41.4292	0.5474		31.54	0.3802
41.5606	0.5474		31.5729	0.3729
42.0534	0.5474		31.8686	0.3729
42.2505	0.5474		32.23	0.3654
42.2834	0.5474		32.46	0.3654
42.5133	0.5474		32.7885	0.3654
42.9076	0.5474		33.4127	0.3654
42.9733	0.5474		33.5113	0.3654
43.4333	0.5474		34.7926	0.3654
43.7618	0.5376		34.8255	0.3569
43.9918	0.5376		37.2238	0.3569
44.2218	0.5376		37.5195	0.3569
44.7803	0.5376		38.8337	0.3569
45.2402	0.5273		39.4579	0.3569
45.7659	0.5273		39.5893	0.3475
45.963	0.5273		40.5421	0.3475
46.9487	0.5273		40.9035	0.3475
48.6242	0.5273		43.3347	0.3475
48.9528	0.5273		45.7002	0.3475
49.4784	0.5273		45.8316	0.3475
49.7413	0.5273		45.9302	0.3367
49.9713	0.5273		46.423	0.3367
50.1355	0.5273		47.77	0.3367
50.2341	0.5273		48.1314	0.3367

## Sheet: Figure 2B
<=9 years education			>9 years
months	survival		months	survival
0.164271	1		0.131417	1
0.197125	1		0.197125	1
0.229979	1		0.262834	1
0.262834	1		0.295688	1
0.295688	1		0.361396	1
0.361396	1		0.394251	1
0.394251	1		0.427105	1
0.427105	0.9971		0.459959	1
0.459959	0.9971		0.492813	1
0.492813	0.9942		0.525667	0.9963
0.558522	0.9942		0.62423	0.9963
0.591376	0.9942		0.657084	0.9926
0.62423	0.9942		0.788501	0.9926
0.657084	0.9912		0.854209	0.9926
0.722793	0.9912		0.887064	0.9926
0.755647	0.9881		0.919918	0.9889
0.788501	0.9881		1.01848	0.9889
0.821355	0.9881		1.05133	0.9889
0.854209	0.985		1.11704	0.9851
0.887064	0.985		1.1499	0.9851
0.919918	0.9818		1.41273	0.9851
0.952772	0.9818		1.44559	0.9851
1.01848	0.9786		1.47844	0.9851
1.08419	0.9786		1.577	0.9812
1.11704	0.9786		1.60986	0.9812
1.18275	0.9754		1.97125	0.9812
1.21561	0.9754		2.06982	0.9812
1.41273	0.9754		2.10267	0.9812
1.44559	0.9754		2.26694	0.9812
1.51129	0.9721		2.3655	0.9812
1.54415	0.9721		2.46407	0.9812
1.577	0.9721		3.154	0.9772
1.60986	0.9721		3.21971	0.9772
1.74127	0.9687		3.8768	0.9772
1.83984	0.9687		4.00821	0.9772
1.87269	0.9687		4.13963	0.9731
1.90554	0.9654		4.63244	0.9731
1.97125	0.9654		4.73101	0.969
2.00411	0.962		5.02669	0.965
2.10267	0.962		5.28953	0.965
2.16838	0.962		5.38809	0.965
2.20123	0.9586		5.4538	0.9609
2.26694	0.9552		5.61807	0.9609
2.29979	0.9518		5.71663	0.9567
2.33265	0.9484		6.14374	0.9567
2.39836	0.9484		6.20945	0.9567
2.43121	0.9449		6.30801	0.9526
2.46407	0.9415		6.34086	0.9484
2.49692	0.9381		6.47228	0.9484
2.52977	0.9347		6.63655	0.9484
2.56263	0.9347		6.83368	0.9484
2.59548	0.9347		7.49076	0.9399
2.62834	0.9312		7.62218	0.9399
2.7269	0.9312		7.8193	0.9357
2.79261	0.9277		7.85216	0.9314
2.85832	0.9277		8.04928	0.9272
2.89117	0.9277		8.27926	0.9272
2.98973	0.9277		8.90349	0.9229
3.02259	0.9242		9.06776	0.9229
3.05544	0.9171		9.23203	0.9229
3.0883	0.9135		9.46201	0.9186
3.12115	0.91		9.62628	0.9142
3.21971	0.9064		9.69199	0.9099
3.35113	0.9028		9.79055	0.9056
3.38398	0.8993		10.0862	0.9056
3.41684	0.8993		10.2177	0.9012
3.44969	0.8957		10.2505	0.8969
3.48255	0.8957		10.2834	0.8969
3.54825	0.8957		10.4805	0.8925
3.77823	0.892		10.6448	0.8881
3.8768	0.8884		11.039	0.8837
4.13963	0.8884		11.4661	0.8837
4.20534	0.8884		11.8275	0.8837
4.3039	0.8848		11.9918	0.8792
4.36961	0.8848		12.2546	0.8792
4.40246	0.8811		12.5503	0.8792
4.56674	0.8811		12.6817	0.8792
4.59959	0.8774		13.0103	0.8747
4.73101	0.8774		13.2074	0.8702
4.76386	0.8774		13.4374	0.8702
4.79671	0.8774		13.6016	0.8702
4.89528	0.8737		13.8973	0.8611
5.05955	0.8662		14.0616	0.8611
5.0924	0.8625		14.0945	0.8565
5.19097	0.8587		14.1602	0.852
5.22382	0.8587		14.2259	0.8474
5.25667	0.8587		14.653	0.8428
5.38809	0.855		14.7844	0.8382
5.4538	0.855		14.8501	0.8336
5.48665	0.8512		14.883	0.8336
5.61807	0.8512		14.9158	0.8336
5.65092	0.8512		15.0144	0.8336
5.68378	0.8512		15.0801	0.8289
5.84805	0.8435		15.1129	0.8289
5.94661	0.8397		15.3101	0.8242
6.01232	0.8358		15.54	0.8195
6.07803	0.8319		15.5729	0.8195
6.30801	0.8319		15.8357	0.8195
6.47228	0.828		16.1971	0.8148
6.6037	0.8242		16.5585	0.81
6.6694	0.8203		16.6899	0.8052
6.86653	0.8203		16.7556	0.8005
6.99795	0.8164		17.0185	0.7957
7.16222	0.8125		17.2156	0.7957
7.29363	0.8085		17.5113	0.7909
7.35934	0.8085		17.8727	0.7861
7.45791	0.8046		18.1355	0.7861
7.58932	0.8006		18.2012	0.7812
7.62218	0.7967		18.3326	0.7764
7.65503	0.7967		18.3984	0.7715
7.72074	0.7967		18.6612	0.7666
7.78645	0.7927		18.9569	0.7618
7.98357	0.7887		19.5811	0.7618
8.01643	0.7887		19.8439	0.7569
8.04928	0.7847		19.9754	0.7569
8.24641	0.7807		20.0082	0.7569
8.31211	0.7767		20.3696	0.7569
8.41068	0.7767		20.4682	0.7519
8.73922	0.7767		21.0267	0.7469
8.90349	0.7686		21.0595	0.7469
9.00205	0.7645		21.2567	0.7469
9.03491	0.7645		21.3224	0.7418
9.10062	0.7604		21.4867	0.7367
9.19918	0.7563		21.8809	0.7367
9.23203	0.7563		21.9466	0.7316
9.26489	0.7522		22.1766	0.7316
9.46201	0.7481		22.5051	0.7265
9.49487	0.7481		22.8008	0.7213
9.56057	0.7481		22.8994	0.7162
10.0205	0.7439		22.9979	0.711
10.0862	0.7397		23.3922	0.711
10.2177	0.7355		23.4908	0.7057
10.2505	0.7355		23.7207	0.7057
10.6776	0.7313		23.7536	0.7004
10.7433	0.7313		23.7864	0.7004
10.7762	0.7271		24.115	0.6951
10.9076	0.7271		24.6407	0.6951
11.2361	0.7228		24.7392	0.6897
11.4333	0.7185		24.8049	0.6897
11.499	0.7185		25.1006	0.6788
11.5647	0.7142		25.3306	0.6788
11.6632	0.7142		25.7577	0.6788
11.729	0.7099		25.7906	0.6733
11.8275	0.7099		26.0862	0.6733
11.8932	0.7099		26.2177	0.6733
12.1561	0.7099		26.2834	0.6677
12.1889	0.7055		26.5462	0.662
12.2875	0.7055		26.7762	0.6564
12.4517	0.701		26.8419	0.6507
12.6489	0.6965		27.1047	0.6507
12.6817	0.6921		27.3347	0.645
12.7146	0.6921		27.5647	0.645
12.8789	0.6921		27.9589	0.645
13.2731	0.6875		28.6817	0.645
13.4045	0.683		28.8131	0.645
13.6674	0.6785		28.9117	0.645
13.963	0.6785		29.076	0.6389
14.0287	0.6785		29.306	0.6327
14.3573	0.6785		29.5359	0.6327
14.3901	0.6739		29.5688	0.6327
14.4887	0.6693		29.8973	0.6327
14.5544	0.6693		30.1273	0.6327
14.5873	0.6646		30.2587	0.6263
14.6201	0.6646		30.4887	0.6198
14.7187	0.6599		30.6201	0.6134
14.883	0.6553		30.7844	0.6069
14.9158	0.6506		30.8172	0.6069
14.9487	0.6506		30.883	0.6069
14.9815	0.6459		31.0472	0.6069
15.0144	0.6412		31.0801	0.6002
15.1786	0.6364		31.2115	0.6002
15.2772	0.6317		31.5729	0.5935
15.3101	0.6317		32.1643	0.5935
15.4743	0.627		32.23	0.5867
15.7043	0.6175		32.6571	0.5867
15.7372	0.6127		32.7885	0.5867
15.8029	0.608		32.8214	0.5867
15.9014	0.608		33.0185	0.5867
16.0329	0.6032		33.4127	0.5867
16.1314	0.6032		33.5113	0.5867
16.7885	0.6032		33.9713	0.5867
17.117	0.5983		34.0041	0.5793
17.2156	0.5983		34.1027	0.5793
17.3799	0.5934		34.6612	0.5793
17.4456	0.5934		34.7926	0.5793
17.7413	0.5786		34.8255	0.5715
18.1027	0.5786		35.9754	0.5715
18.1355	0.5786		36.6653	0.5715
18.2012	0.5736		37.1581	0.5715
18.2341	0.5685		37.2238	0.5715
18.4969	0.5685		37.5195	0.5715
18.5298	0.5685		37.848	0.5632
18.5626	0.5634		38.5708	0.5632
18.5955	0.5634		38.8337	0.5632
18.6612	0.5582		39.2608	0.5632
18.924	0.5582		39.4579	0.5632
18.9569	0.553		40.9035	0.5632
19.5483	0.553		41.1335	0.5632
19.7454	0.5477		41.4292	0.5542
20.1068	0.5477		42.0534	0.5542
20.271	0.5423		42.2505	0.5542
20.4025	0.537		42.5133	0.5542
20.4682	0.5316		42.9733	0.5542
20.7639	0.5316		43.4333	0.5542
20.9938	0.526		43.7618	0.5443
21.1581	0.5205		43.9918	0.5443
21.191	0.5205		44.7803	0.5443
21.2567	0.5149		45.7659	0.5443
21.2895	0.5093		45.8316	0.5443
21.5195	0.5093		45.9302	0.5336
21.5524	0.5093		45.963	0.5336
21.7166	0.5093		46.9487	0.5336
22.078	0.5035		48.1314	0.5336
22.6037	0.5035		48.6242	0.5336
22.8008	0.4977		48.7228	0.5336
23.0965	0.4917		48.9528	0.5336
23.1622	0.4917		49.4784	0.5336
23.1951	0.4858		49.9713	0.5336
23.5565	0.4798		50.2341	0.5336
23.6879	0.4798		50.2669	0.5336
23.7864	0.4737
23.9507	0.4676
24.1807	0.4676
24.8378	0.4615
24.9692	0.4615
25.1992	0.4615
25.232	0.4615
25.462	0.4615
25.5934	0.455
25.6591	0.4485
26.1191	0.442
26.2505	0.442
26.3162	0.442
26.3819	0.442
26.4148	0.442
26.5462	0.442
26.7762	0.442
26.8419	0.442
26.9733	0.4347
27.2361	0.4347
27.269	0.4347
27.3018	0.4271
27.3676	0.4271
27.4004	0.4271
27.4661	0.419
27.5647	0.4108
27.6304	0.4026
27.6632	0.4026
27.729	0.3942
27.8932	0.3942
27.9261	0.3942
27.9589	0.3942
28.2875	0.3942
28.3532	0.3942
28.4517	0.3942
29.1745	0.3844
29.8316	0.3745
30.423	0.3745
31.2772	0.3745
31.54	0.3641
31.8686	0.3641
32.23	0.3641
32.3943	0.3531
32.5257	0.3531
32.7885	0.3531
33.2485	0.3413
33.3799	0.3413
33.4127	0.3413
34.2998	0.3413
34.7926	0.3413
35.5154	0.3413
36.7639	0.3413
37.5852	0.3265
37.6181	0.3265
39.2608	0.3265
40.5421	0.3265
40.9692	0.3265
41.1663	0.3265
41.5606	0.3265
42.2834	0.3265
42.9076	0.3265
43.3347	0.3265
44.2218	0.3265
45.2402	0.2993
47.77	0.2993
49.7413	0.2993
50.1355	0.2993

## Sheet: Figure 2C
ECOG 0-1			ECOG 2			ECOG 3
months	Survival		months	Survival		months	Survival
0.229979	1		0.197125	1		0	1
0.361396	1		0.229979	1		0.525667	0.9286
0.394251	1		0.262834	1		0.755647	0.9286
0.558522	1		0.394251	1		0.854209	0.8512
0.62423	1		0.459959	1		1.01848	0.7738
0.657084	1		0.525667	1		2.26694	0.7738
0.755647	1		0.62423	1		2.33265	0.6771
0.788501	1		0.657084	0.9916		3.02259	0.5804
0.821355	1		0.755647	0.9916		5.05955	0.4836
0.854209	1		0.887064	0.9916		8.24641	0.4836
0.887064	1		0.919918	0.9745		11.4661	0.4836
0.919918	1		1.11704	0.9745		16.1971	0.3224
0.952772	1		1.31417	0.9659		25.6591	0.1612
1.05133	1		1.44559	0.9659		40.9035	0.1612
1.08419	1		1.90554	0.9572
1.1499	1		2.20123	0.9485
1.21561	1		2.26694	0.9398
1.44559	1		2.3655	0.9398
1.47844	1		2.49692	0.9398
1.51129	0.997		2.7269	0.9398
1.54415	0.997		2.79261	0.9308
1.577	0.997		3.05544	0.9219
1.74127	0.994		3.0883	0.9128
1.83984	0.994		3.18686	0.9038
1.97125	0.994		3.21971	0.8948
2.00411	0.991		3.77823	0.8856
2.06982	0.991		3.90965	0.8856
2.29979	0.9879		4.3039	0.8764
2.39836	0.9879		4.63244	0.8764
2.46407	0.9879		5.05955	0.8671
2.49692	0.9848		5.38809	0.8578
2.59548	0.9848		5.4538	0.8483
2.62834	0.9818		5.48665	0.8389
2.89117	0.9818		5.68378	0.8389
2.98973	0.9818		5.84805	0.8294
3.12115	0.9818		6.14374	0.8294
3.154	0.9786		6.27515	0.8196
3.25257	0.9786		6.30801	0.8099
3.38398	0.9755		6.34086	0.8001
3.41684	0.9755		6.47228	0.8001
3.44969	0.9724		6.83368	0.8001
3.48255	0.9724		7.16222	0.8001
3.54825	0.9724		7.35934	0.8001
3.71253	0.9724		7.78645	0.7898
3.77823	0.9692		7.98357	0.7796
3.8768	0.9692		8.73922	0.7796
4.13963	0.966		8.90349	0.7796
4.23819	0.966		9.00205	0.769
4.40246	0.9628		9.56057	0.769
4.56674	0.9628		9.62628	0.7584
4.6653	0.9628		9.69199	0.7477
4.73101	0.9596		9.79055	0.737
4.86242	0.9596		10.0205	0.7263
5.19097	0.9564		10.0862	0.7155
5.22382	0.9564		10.2505	0.7046
5.4538	0.9564		10.2834	0.7046
5.58522	0.9564		10.7433	0.7046
5.65092	0.9564		10.7762	0.6935
5.71663	0.9531		10.9076	0.6935
6.01232	0.9498		11.9918	0.6821
6.07803	0.9465		12.1889	0.6707
6.47228	0.9432		12.2546	0.6707
6.6694	0.9399		12.5503	0.6707
7.16222	0.9367		12.6817	0.659
7.45791	0.9334		13.2074	0.6472
7.58932	0.9301		13.4374	0.6472
7.62218	0.9268		14.2259	0.6352
7.65503	0.9268		14.3901	0.6232
7.8193	0.9235		14.6201	0.6232
8.01643	0.9202		14.8501	0.611
8.04928	0.9169		14.883	0.5988
8.24641	0.9135		14.9158	0.5863
8.27926	0.9135		14.9487	0.5863
8.90349	0.9069		14.9815	0.5736
8.93634	0.9035		17.7413	0.5608
9.03491	0.9035		18.3984	0.5481
9.06776	0.9035		18.5298	0.5481
9.23203	0.9035		20.0082	0.535
9.46201	0.8968		20.2382	0.535
9.49487	0.8968		21.0267	0.5216
10.0205	0.8968		21.0595	0.5216
10.0862	0.8968		21.1581	0.5079
10.2177	0.8933		21.2895	0.4942
10.2505	0.8933		21.5524	0.4942
10.2834	0.8933		22.8008	0.4659
10.6776	0.8899		23.4908	0.4518
11.039	0.8864		23.7207	0.4518
11.0719	0.8864		24.115	0.4373
11.1704	0.8864		24.9692	0.4373
11.2361	0.883		25.1992	0.4373
11.499	0.883		26.2834	0.4216
11.5647	0.8795		26.3819	0.4216
11.6632	0.8795		26.9733	0.4054
11.729	0.876		27.3347	0.3892
11.8275	0.876		27.4661	0.373
11.8932	0.876		28.3532	0.373
12.1561	0.876		28.9117	0.373
12.1889	0.876		30.423	0.373
12.2875	0.876		32.5585	0.3543
12.4517	0.8724		32.7885	0.3543
12.6489	0.8688		33.0185	0.3543
12.7146	0.8688		33.2485	0.3335
12.846	0.8688		40.5421	0.3335
12.8789	0.8688		43.4333	0.3335
13.0103	0.8652		43.7618	0.3097
13.2731	0.8616		45.2402	0.2859
13.6674	0.8579		50.2341	0.2859
13.8973	0.8507
13.963	0.8507
14.0616	0.8507
14.2259	0.847
14.3573	0.847
14.4887	0.8433
14.5544	0.8433
14.653	0.8396
14.7187	0.8359
14.9158	0.8359
15.0144	0.8322
15.1786	0.8285
15.3101	0.8247
15.5729	0.8247
15.7043	0.821
15.7372	0.8172
15.8029	0.8134
15.9014	0.8134
16.0329	0.8097
16.1314	0.8097
16.3614	0.8059
16.5585	0.8021
16.6899	0.7983
16.7556	0.7945
16.7885	0.7945
16.8542	0.7945
17.0185	0.7906
17.117	0.7868
17.1828	0.7868
17.2156	0.7868
17.2813	0.7868
17.3142	0.7829
17.3799	0.779
17.5113	0.7751
17.7413	0.7673
17.8727	0.7634
18.1027	0.7634
18.1355	0.7634
18.3326	0.7595
18.6612	0.7515
18.924	0.7515
18.9569	0.7436
19.5483	0.7436
19.5811	0.7436
19.7454	0.7396
19.8439	0.7356
20.0082	0.7356
20.1068	0.7356
20.271	0.7315
20.3039	0.7315
20.3696	0.7315
20.4025	0.7274
20.4682	0.7192
21.191	0.7192
21.3224	0.715
21.4867	0.7108
21.5195	0.7108
21.7166	0.7108
21.9466	0.7066
22.078	0.7023
22.1766	0.6981
22.5051	0.6939
22.6037	0.6939
22.7023	0.6939
22.8008	0.6939
22.8994	0.6895
22.9979	0.6852
23.0965	0.6808
23.1622	0.6808
23.3922	0.6808
23.5565	0.6764
23.6879	0.6764
23.7207	0.6764
23.7536	0.6719
23.7864	0.6674
23.9507	0.6629
24.1807	0.6629
24.8378	0.6584
25.1006	0.6493
25.232	0.6493
25.3306	0.6493
25.462	0.6493
25.5934	0.6446
26.0862	0.6446
26.1191	0.6399
26.2505	0.6399
26.2834	0.6399
26.3162	0.6399
26.4148	0.6399
26.5462	0.6351
26.8419	0.6302
27.1047	0.6302
27.2361	0.6302
27.269	0.6302
27.4004	0.6302
27.4661	0.6302
27.5647	0.6249
27.6304	0.6196
27.6632	0.6196
27.729	0.6143
27.8932	0.6143
27.9261	0.6143
27.9589	0.6143
28.2875	0.6143
28.3532	0.6143
28.4517	0.6143
28.6817	0.6143
28.8131	0.6143
28.9117	0.6143
29.076	0.6084
29.1745	0.6025
29.306	0.5966
29.5031	0.5966
29.5359	0.5966
29.8316	0.5906
29.8973	0.5906
30.0616	0.5845
30.1273	0.5845
30.193	0.5783
30.2587	0.5722
30.6201	0.566
30.7844	0.5599
30.8172	0.5599
31.0472	0.5599
31.0801	0.5536
31.2772	0.5536
31.5729	0.5472
31.9014	0.5472
32.1643	0.5472
32.23	0.5407
32.3943	0.5341
32.5257	0.5341
32.7885	0.5341
32.8214	0.5341
33.4127	0.5341
33.5113	0.5341
33.9713	0.5341
34.1027	0.5341
34.2998	0.5341
34.6612	0.5341
34.7926	0.5341
36.6653	0.5341
37.1581	0.5341
37.5195	0.5341
37.5852	0.526
37.6181	0.526
37.848	0.5178
38.5708	0.5178
39.2608	0.5178
39.4579	0.5178
39.5893	0.509
40.9692	0.509
41.1663	0.509
41.5606	0.509
42.0534	0.509
42.2505	0.509
42.2834	0.509
42.5133	0.509
42.9076	0.509
42.9733	0.509
43.3347	0.509
43.9918	0.509
44.2218	0.509
44.7803	0.509
45.8316	0.509
45.963	0.509
46.423	0.509
46.9487	0.509
48.1314	0.509
48.6242	0.509
49.4784	0.509
49.7413	0.509
50.1355	0.509
50.2341	0.509
#VALUE!
#VALUE!	--------------------

## Sheet: Figure 2D
Stage I-II			III-IVB			IVC
months	Survival		months	Survival		months	Survival
0.164271	1		0.131417	1		0.0985626	1
0.427105	1		0.164271	1		0.131417	1
0.525667	1		0.197125	1		0.164271	1
0.62423	1		0.229979	1		0.361396	1
1.11704	1		0.262834	1		0.394251	1
2.85832	1		0.295688	1		0.525667	0.9909
3.77823	0.9778		0.361396	1		0.657084	0.9818
3.8768	0.9778		0.394251	1		0.755647	0.9818
4.23819	0.9778		0.427105	0.9982		0.821355	0.9818
4.76386	0.9778		0.459959	0.9982		0.887064	0.9818
5.19097	0.9539		0.492813	0.9964		0.919918	0.9723
5.25667	0.9539		0.525667	0.9964		0.952772	0.9723
6.47228	0.9539		0.558522	0.9964		1.11704	0.9723
8.24641	0.9539		0.591376	0.9964		1.21561	0.9723
8.93634	0.9281		0.62423	0.9964		1.44559	0.9723
10.0862	0.9281		0.657084	0.9945		1.51129	0.9622
10.2834	0.9281		0.722793	0.9945		1.77413	0.9622
14.5544	0.9281		0.755647	0.9908		1.90554	0.9519
15.0144	0.9		0.788501	0.9908		1.97125	0.9519
17.1828	0.9		0.821355	0.9908		2.26694	0.9416
17.3799	0.871		0.854209	0.9889		2.29979	0.9311
19.5483	0.871		0.887064	0.9889		2.33265	0.9207
20.4682	0.841		0.919918	0.9869		2.43121	0.9102
23.6879	0.841		0.952772	0.9831		2.46407	0.9102
25.7577	0.841		1.01848	0.9811		2.49692	0.8996
26.7762	0.8086		1.05133	0.9811		2.7269	0.8996
27.5647	0.7763		1.08419	0.9811		2.89117	0.8996
29.8973	0.7763		1.11704	0.9792		3.05544	0.8996
32.6571	0.7763		1.1499	0.9792		3.154	0.8886
33.4127	0.7763		1.18275	0.9772		3.21971	0.8886
34.6612	0.7763		1.21561	0.9772		3.38398	0.8775
36.6653	0.7763		1.31417	0.9752		3.71253	0.8775
37.6181	0.7763		1.41273	0.9752		3.81109	0.8663
37.848	0.7331		1.47844	0.9752		3.8768	0.855
38.5708	0.7331		1.54415	0.9752		3.90965	0.855
38.8337	0.7331		1.577	0.9732		4.00821	0.855
42.9076	0.7331		1.60986	0.9732		4.6653	0.855
43.9918	0.7331		1.67556	0.9732		4.73101	0.8433
46.9487	0.7331		1.74127	0.9712		4.89528	0.8316
48.9528	0.7331		1.83984	0.9712		5.4538	0.8316
49.4784	0.7331		1.87269	0.9712		5.68378	0.8316
50.2341	0.7331		1.97125	0.9712		5.84805	0.8075
			2.00411	0.9692		5.94661	0.8075
			2.06982	0.9692		6.6037	0.7951
			2.10267	0.9692		7.29363	0.7827
			2.16838	0.9692		7.45791	0.7702
			2.20123	0.9671		7.49076	0.7578
			2.26694	0.9671		8.01643	0.7454
			2.39836	0.9671		8.24641	0.7327
			2.46407	0.9651		8.41068	0.7327
			2.49692	0.9651		8.73922	0.7327
			2.52977	0.963		9.49487	0.7327
			2.56263	0.963		9.62628	0.7194
			2.59548	0.963		10.0205	0.7061
			2.62834	0.961		10.2505	0.7061
			2.7269	0.961		11.6632	0.7061
			2.75975	0.961		11.8275	0.7061
			2.79261	0.9589		12.4517	0.6917
			2.85832	0.9589		13.2731	0.6773
			2.98973	0.9589		14.2259	0.6629
			3.02259	0.9568		14.3573	0.6629
			3.05544	0.9526		14.5873	0.6481
			3.0883	0.9505		14.883	0.6334
			3.12115	0.9484		14.9815	0.6183
			3.18686	0.9463		15.54	0.6032
			3.21971	0.9421		16.1971	0.5882
			3.25257	0.9421		16.6899	0.5731
			3.35113	0.94		16.8542	0.5731
			3.38398	0.94		17.2156	0.5731
			3.41684	0.94		18.1355	0.5731
			3.44969	0.9378		18.4969	0.5731
			3.48255	0.9378		18.5626	0.5562
			3.5154	0.9357		19.8439	0.5394
			3.54825	0.9357		19.9754	0.5394
			3.74538	0.9336		20.2382	0.5394
			3.77823	0.9315		20.271	0.5214
			3.97536	0.9293		20.3696	0.5214
			4.10678	0.9272		20.4682	0.5214
			4.13963	0.9251		21.0267	0.5021
			4.20534	0.9251		21.2567	0.5021
			4.3039	0.923		21.2895	0.482
			4.36961	0.923		21.3224	0.4619
			4.40246	0.9208		21.8809	0.4619
			4.56674	0.9208		22.9979	0.4409
			4.59959	0.9187		23.4908	0.4199
			4.63244	0.9187		23.9507	0.3989
			4.73101	0.9187		25.1992	0.3989
			4.86242	0.9187		25.462	0.3989
			5.02669	0.9165		25.5934	0.3755
			5.05955	0.9122		25.6591	0.352
			5.0924	0.91		26.2834	0.352
			5.22382	0.91		26.3819	0.352
			5.28953	0.91		27.6961	0.3249
			5.35524	0.91		27.9589	0.3249
			5.38809	0.9078		28.9117	0.3249
			5.4538	0.9057		29.306	0.2924
			5.48665	0.9035		30.423	0.2924
			5.58522	0.9035		32.46	0.2924
			5.61807	0.9035		35.5154	0.2924
			5.65092	0.9035		40.9692	0.2924
			5.68378	0.9035		45.9302	0.2193
			5.71663	0.9013
			5.94661	0.8991
			6.01232	0.8969
			6.07803	0.8946
			6.14374	0.8946
			6.20945	0.8946
			6.27515	0.8924
			6.30801	0.8902
			6.34086	0.888
			6.37372	0.888
			6.47228	0.8857
			6.50513	0.8857
			6.63655	0.8857
			6.6694	0.8835
			6.83368	0.8835
			6.86653	0.8835
			6.99795	0.8812
			7.16222	0.879
			7.35934	0.879
			7.3922	0.8767
			7.49076	0.8744
			7.58932	0.8721
			7.62218	0.8698
			7.65503	0.8698
			7.72074	0.8698
			7.78645	0.8675
			7.8193	0.8652
			7.85216	0.8629
			7.98357	0.8606
			8.04928	0.856
			8.27926	0.856
			8.31211	0.8537
			8.90349	0.8468
			9.00205	0.8445
			9.03491	0.8445
			9.06776	0.8445
			9.10062	0.8422
			9.19918	0.8398
			9.23203	0.8398
			9.26489	0.8375
			9.46201	0.8305
			9.56057	0.8305
			9.69199	0.8281
			9.7577	0.8258
			9.79055	0.8234
			10.0205	0.8234
			10.0862	0.8211
			10.2177	0.8164
			10.2505	0.814
			10.2834	0.814
			10.4805	0.8117
			10.5791	0.8093
			10.6448	0.807
			10.6776	0.8046
			10.7433	0.8046
			10.7762	0.8022
			10.9076	0.8022
			11.039	0.7999
			11.0719	0.7999
			11.1704	0.7999
			11.2361	0.7975
			11.4661	0.7975
			11.499	0.7975
			11.5647	0.7951
			11.729	0.7927
			11.8275	0.7927
			11.8932	0.7927
			11.9918	0.7903
			12.1561	0.7903
			12.1889	0.7878
			12.2546	0.7878
			12.2875	0.7878
			12.5503	0.7878
			12.6489	0.7854
			12.6817	0.7829
			12.7146	0.7829
			12.846	0.7829
			12.8789	0.7829
			13.0103	0.7804
			13.2074	0.7779
			13.2731	0.7779
			13.4045	0.7754
			13.4374	0.7754
			13.6016	0.7754
			13.6674	0.7729
			13.8973	0.7679
			13.963	0.7679
			14.0287	0.7679
			14.0616	0.7679
			14.0945	0.7653
			14.1602	0.7628
			14.2259	0.7603
			14.3901	0.7577
			14.4887	0.7552
			14.6201	0.7552
			14.653	0.7526
			14.7187	0.7501
			14.7844	0.7475
			14.8501	0.745
			14.883	0.745
			14.9158	0.7424
			14.9487	0.7424
			15.0144	0.7424
			15.0801	0.7398
			15.1129	0.7398
			15.1786	0.7372
			15.2772	0.7346
			15.3101	0.732
			15.4743	0.7294
			15.5729	0.7294
			15.7043	0.7242
			15.7372	0.719
			15.8029	0.7164
			15.8357	0.7164
			15.9014	0.7164
			16.0329	0.7137
			16.1314	0.7137
			16.3614	0.7111
			16.5585	0.7084
			16.7556	0.7058
			16.7885	0.7058
			17.0185	0.7031
			17.117	0.7004
			17.2156	0.7004
			17.2813	0.7004
			17.3142	0.6977
			17.4456	0.6977
			17.4784	0.695
			17.5113	0.6923
			17.7413	0.6842
			17.8727	0.6815
			17.9384	0.6815
			18.1027	0.6815
			18.1355	0.6815
			18.2012	0.676
			18.2341	0.6733
			18.3326	0.6706
			18.3984	0.6678
			18.5298	0.6678
			18.5955	0.6678
			18.6612	0.6623
			18.924	0.6623
			18.9569	0.6568
			19.2526	0.6568
			19.5811	0.6568
			19.7454	0.654
			19.8439	0.654
			20.0082	0.6511
			20.1068	0.6511
			20.3039	0.6511
			20.4025	0.6483
			20.4682	0.6454
			20.7639	0.6454
			20.9938	0.6425
			21.0595	0.6425
			21.1581	0.6397
			21.191	0.6397
			21.2567	0.6367
			21.4867	0.6338
			21.5195	0.6338
			21.5524	0.6338
			21.7166	0.6338
			21.9466	0.6309
			22.078	0.6279
			22.1766	0.625
			22.5051	0.622
			22.6037	0.622
			22.7023	0.622
			22.8008	0.616
			22.8994	0.613
			23.0965	0.61
			23.1622	0.61
			23.1951	0.607
			23.3922	0.607
			23.5565	0.6039
			23.7207	0.6039
			23.7536	0.6009
			23.7864	0.5978
			23.9507	0.5947
			24.115	0.5916
			24.1807	0.5916
			24.6407	0.5916
			24.8049	0.5916
			24.8378	0.5884
			24.9692	0.5884
			25.1006	0.5821
			25.232	0.5821
			25.3306	0.5821
			25.7906	0.5789
			26.0862	0.5789
			26.1191	0.5757
			26.2177	0.5757
			26.2505	0.5757
			26.2834	0.5724
			26.3162	0.5724
			26.4148	0.5724
			26.5133	0.5724
			26.5462	0.5691
			26.7762	0.5691
			26.8419	0.5657
			26.9733	0.5623
			27.1047	0.5623
			27.2361	0.5623
			27.269	0.5623
			27.3018	0.5588
			27.3347	0.5553
			27.3676	0.5553
			27.4004	0.5553
			27.4661	0.5518
			27.5647	0.5518
			27.6304	0.5482
			27.6632	0.5482
			27.729	0.5445
			27.8932	0.5445
			27.9261	0.5445
			27.9589	0.5445
			28.2875	0.5445
			28.3532	0.5445
			28.4517	0.5445
			28.6817	0.5445
			28.8131	0.5445
			28.9117	0.5445
			29.076	0.5406
			29.1745	0.5367
			29.5031	0.5367
			29.5359	0.5367
			29.5688	0.5367
			29.8316	0.5327
			30.0616	0.5287
			30.1273	0.5287
			30.193	0.5247
			30.2587	0.5206
			30.4887	0.5166
			30.6201	0.5126
			30.7844	0.5085
			30.8172	0.5085
			30.883	0.5085
			31.0472	0.5085
			31.0801	0.5044
			31.2772	0.5044
			31.54	0.5002
			31.5729	0.4961
			31.8686	0.4961
			31.9014	0.4961
			32.1643	0.4961
			32.23	0.4918
			32.3943	0.4875
			32.5257	0.4875
			32.5585	0.4831
			32.7885	0.4831
			32.8214	0.4831
			33.0185	0.4831
			33.2485	0.4786
			33.3799	0.4786
			33.4127	0.4786
			33.5113	0.4786
			33.9713	0.4786
			34.0041	0.4739
			34.1027	0.4739
			34.2998	0.4739
			34.7926	0.4739
			34.8255	0.469
			35.9754	0.469
			36.4682	0.469
			36.7639	0.469
			37.1581	0.469
			37.2238	0.469
			37.5195	0.469
			37.5852	0.4638
			39.2608	0.4638
			39.4579	0.4638
			39.5893	0.4584
			40.5421	0.4584
			40.9035	0.4584
			41.1335	0.4584
			41.1663	0.4584
			41.4292	0.4528
			41.5606	0.4528
			42.0534	0.4528
			42.2505	0.4528
			42.2834	0.4528
			42.5133	0.4528
			42.9733	0.4528
			43.3347	0.4528
			43.4333	0.4528
			43.7618	0.4465
			44.2218	0.4465
			44.7803	0.4465
			45.2402	0.44
			45.7002	0.44
			45.7659	0.44
			45.8316	0.44
			45.963	0.44
			46.423	0.44
			47.77	0.44
			48.1314	0.44
			48.6242	0.44
			48.7228	0.44
			49.7413	0.44
			49.9713	0.44
			50.1355	0.44
			50.2341	0.44
			50.2669	0.44

## Sheet: Figure 2E
No treatment			Radiation only			Chemotherapy			CCRT			Sequential chemo and radiotherapy			Chemotherapy-CCRT
months	survival		months	survival		months	survival		months	survival		months	survival		months	survival
0.197125	1		0	1		0	1		0.394251	1		0	1		1.97125	1
0.262834	1		0.854209	0.9643		0.657084	0.9883		0.919918	0.9892		3.0883	0.9948		3.25257	1
0.427105	0.9821		1.1499	0.9643		0.755647	0.9883		1.60986	0.9892		4.79671	0.9948		3.38398	1
0.492813	0.9643		2.79261	0.9643		0.788501	0.9883		2.26694	0.9892		5.58522	0.9948		3.81109	0.9897
0.525667	0.9464		5.28953	0.9643		0.919918	0.9883		2.56263	0.9892		5.84805	0.9895		5.35524	0.9897
0.62423	0.9464		5.38809	0.9643		0.952772	0.9823		2.59548	0.9892		6.47228	0.9895		5.61807	0.9897
0.755647	0.91		6.99795	0.9224		1.01848	0.9823		3.12115	0.978		6.50513	0.9895		6.27515	0.9792
0.919918	0.8918		10.0862	0.9224		1.08419	0.9823		3.21971	0.9555		8.01643	0.9895		7.35934	0.9792
0.952772	0.8736		10.2834	0.9224		1.11704	0.9823		3.74538	0.9443		8.27926	0.9895		7.58932	0.9685
1.01848	0.8554		10.6448	0.8762		1.18275	0.9762		3.97536	0.933		8.73922	0.9895		7.62218	0.9579
1.11704	0.8372		11.8275	0.8762		1.31417	0.9762		4.10678	0.9218		8.90349	0.9787		7.65503	0.9579
1.31417	0.819		11.9918	0.8276		1.41273	0.9762		4.23819	0.9218		9.00205	0.9733		8.24641	0.947
1.51129	0.8008		14.3901	0.7789		1.44559	0.9762		4.56674	0.9218		9.46201	0.9678		9.23203	0.947
1.54415	0.8008		15.0144	0.7302		1.577	0.9762		4.73101	0.9218		9.62628	0.9624		9.56057	0.947
1.577	0.7822		17.1828	0.7302		1.60986	0.9762		4.86242	0.9218		9.69199	0.957		10.0862	0.947
1.74127	0.7636		17.3799	0.678		1.67556	0.9762		4.99384	0.9218		9.79055	0.9515		10.2177	0.9357
2.26694	0.745		17.7413	0.6259		1.83984	0.9762		5.05955	0.9098		10.0205	0.9461		10.9076	0.9357
2.29979	0.7263		18.6612	0.5737		1.87269	0.9762		5.58522	0.9098		10.2505	0.9406		11.1704	0.9357
2.43121	0.7077		19.5483	0.5737		1.90554	0.9697		5.65092	0.9098		10.7433	0.9406		11.4661	0.9357
2.46407	0.6891		19.8439	0.5164		2.00411	0.9632		6.6694	0.8975		11.0719	0.9406		12.6489	0.924
2.52977	0.6705		20.4682	0.459		2.06982	0.9632		7.49076	0.8852		11.4333	0.9351		12.6817	0.924
3.02259	0.6518		22.8008	0.4016		2.10267	0.9632		8.90349	0.8729		11.499	0.9351		13.2731	0.9122
3.05544	0.6146		23.6879	0.4016		2.20123	0.9566		9.06776	0.8729		11.8932	0.9351		13.8973	0.9002
3.18686	0.596		27.729	0.3347		2.33265	0.95		10.4805	0.8605		12.1561	0.9351		13.963	0.9002
3.38398	0.5773		29.8973	0.3347		2.46407	0.95		10.5791	0.848		12.1889	0.9294		14.0287	0.9002
3.5154	0.5587		30.0616	0.251		2.49692	0.9433		13.6016	0.848		12.2546	0.9294		14.9158	0.8878
3.8768	0.5401		38.5708	0.251		2.59548	0.9433		14.1602	0.8353		12.4517	0.9237		15.1129	0.8878
4.59959	0.5215		39.5893	0.1255		2.62834	0.9365		14.7844	0.8227		12.6817	0.9179		15.2772	0.8753
4.89528	0.5028					2.75975	0.9365		14.883	0.8227		13.0103	0.9122		15.7372	0.8628
5.02669	0.4842					2.79261	0.9297		15.0801	0.8096		13.2074	0.9064		15.8357	0.8628
5.05955	0.4656					2.85832	0.9297		15.3101	0.8096		13.6674	0.9007		16.3614	0.8501
5.38809	0.447					2.89117	0.9297		15.5729	0.8096		13.8973	0.895		16.7556	0.8375
5.4538	0.4283					2.98973	0.9297		15.9014	0.8096		14.0616	0.895		17.2156	0.8375
5.61807	0.4283					3.05544	0.9297		16.5585	0.7959		14.2259	0.8892		17.3142	0.8246
5.71663	0.4089					3.154	0.9227		16.8542	0.7959		14.3573	0.8892		17.4784	0.8117
5.94661	0.3894					3.35113	0.9156		17.2156	0.7959		14.5544	0.8892		18.1355	0.8117
6.6037	0.3699					3.41684	0.9156		17.4456	0.7959		14.6201	0.8892		18.5298	0.8117
7.29363	0.3505					3.44969	0.9085		17.5113	0.7814		14.9158	0.8892		18.6612	0.7984
7.49076	0.331					3.48255	0.9085		18.5955	0.7814		15.0144	0.8892		18.9569	0.7851
7.62218	0.331					3.54825	0.9085		19.2526	0.7814		15.1786	0.8832		20.0082	0.7718
9.19918	0.3103					3.77823	0.8941		20.3039	0.7814		15.3101	0.8773		20.9938	0.7585
9.46201	0.2896					3.8768	0.8941		22.1766	0.7661		15.54	0.8713		21.0595	0.7585
9.7577	0.2689					4.00821	0.8941		23.7864	0.7508		15.7043	0.8594		21.5195	0.7585
10.2177	0.2482					4.13963	0.8868		24.8049	0.7508		15.9014	0.8594		22.8008	0.7447
10.7762	0.2276					4.20534	0.8868		25.7577	0.7508		16.0329	0.8533		23.1951	0.7309
11.6632	0.2276					4.3039	0.8793		25.7906	0.7348		16.6899	0.8473		23.7207	0.7309
13.4045	0.2048					4.36961	0.8793		26.2177	0.7348		16.7885	0.8473		24.1807	0.7309
13.4374	0.2048					4.40246	0.8718		26.7762	0.7185		17.0185	0.8413		24.7392	0.7165
14.4887	0.1792					4.63244	0.8718		27.1047	0.7185		17.117	0.8352		24.8378	0.7022
15.4743	0.1536					4.73101	0.8642		27.6632	0.7185		17.2813	0.8352		26.3819	0.7022
18.2012	0.128					5.0924	0.8566		29.5359	0.7185		17.7413	0.8291		26.5133	0.7022
21.2567	0.1024					5.19097	0.8491		31.0801	0.701		17.8727	0.823		26.8419	0.6873
23.4908	0.0768					5.22382	0.8491		31.2115	0.701		17.9384	0.823		27.3018	0.6723
25.5934	0.0512					5.25667	0.8491		31.8686	0.701		18.3326	0.8169		27.3347	0.6574
27.5647	0.0256					5.4538	0.8491		32.6571	0.701		18.3984	0.8108		27.9589	0.6574
34.8255	0					5.48665	0.8413		32.7885	0.701		18.9569	0.8046		28.6817	0.6574
						5.68378	0.8413		33.9713	0.701		19.7454	0.7985		29.1745	0.6414
						5.84805	0.8333		35.9754	0.701		20.0082	0.7985		29.5031	0.6414
						5.94661	0.8333		36.4682	0.701		20.1068	0.7985		29.8316	0.6249
						6.01232	0.8252		37.5852	0.6797		20.271	0.7922		30.2587	0.6085
						6.07803	0.8171		37.848	0.6585		20.4025	0.786		30.4887	0.592
						6.14374	0.8171		39.2608	0.6585		20.4682	0.7798		30.7844	0.5756
						6.30801	0.809		41.1663	0.6585		20.7639	0.7798		31.2772	0.5756
						6.34086	0.8007		45.8316	0.6585		21.0267	0.7734		31.5729	0.5587
						6.37372	0.8007		48.7228	0.6585		21.1581	0.767		31.9014	0.5587
						6.47228	0.7924		48.9528	0.6585		21.191	0.767		32.23	0.5412
						6.63655	0.7924		50.2341	0.6585		21.3224	0.7605		32.5585	0.5237
						6.83368	0.7924					21.4867	0.7541		33.0185	0.5237
						6.86653	0.7924					21.9466	0.7476		33.4127	0.5237
						7.16222	0.7837					22.078	0.7412		34.0041	0.505
						7.3922	0.7749					22.1766	0.7412		35.5154	0.505
						7.45791	0.7661					22.5051	0.7347		37.2238	0.505
						7.72074	0.7661					22.6037	0.7347		40.9035	0.505
						7.78645	0.7572					22.7023	0.7347		43.3347	0.505
						7.8193	0.7482					22.8008	0.7347		43.7618	0.4831
						7.85216	0.7393					22.8994	0.728		45.7002	0.4831
						7.98357	0.7304					22.9979	0.7213		47.77	0.4831
						8.01643	0.7215					23.3922	0.7213		48.6242	0.4831
						8.04928	0.7037					23.7207	0.7213		49.9713	0.4831
						8.31211	0.6948					23.7536	0.7144		50.2341	0.4831
						8.41068	0.6948					23.7864	0.7144
						8.93634	0.6858					23.9507	0.7075
						9.03491	0.6858					24.115	0.7005
						9.10062	0.6766					24.6407	0.7005
						9.23203	0.6766					24.9692	0.7005
						9.26489	0.6674					25.1006	0.6864
						9.46201	0.6581					25.1992	0.6864
						9.49487	0.6581					25.232	0.6864
						10.0862	0.6487					25.3306	0.6864
						10.2834	0.6487					26.0862	0.6864
						10.6776	0.6392					26.1191	0.6789
						11.039	0.6296					26.2834	0.6715
						11.2361	0.6201					26.3162	0.6715
						11.5647	0.6105					26.4148	0.6715
						11.729	0.601					26.5462	0.6637
						11.8275	0.601					26.7762	0.6637
						12.5503	0.601					26.8419	0.6637
						12.846	0.601					26.9733	0.6557
						14.0945	0.591					27.1047	0.6557
						14.2259	0.581					27.2361	0.6557
						14.5873	0.5709					27.269	0.6557
						14.653	0.5609					27.4004	0.6557
						14.7187	0.5509					27.4661	0.6471
						14.8501	0.5409					27.5647	0.6471
						14.883	0.5309					27.6961	0.6384
						14.9487	0.5309					27.8932	0.6384
						14.9815	0.5207					27.9261	0.6384
						15.7372	0.5105					28.2875	0.6384
						15.8029	0.5003					28.4517	0.6384
						16.1971	0.49					28.8131	0.6384
						17.2156	0.49					28.9117	0.6384
						17.7413	0.4796					29.076	0.6287
						18.1027	0.4796					30.1273	0.6287
						18.1355	0.4796					30.193	0.6187
						18.2012	0.4687					30.423	0.6187
						18.2341	0.4578					30.8172	0.6187
						18.4969	0.4578					31.0472	0.6187
						18.5626	0.4467					31.54	0.6082
						18.924	0.4467					32.1643	0.6082
						18.9569	0.4467					32.3943	0.5976
						19.5811	0.4467					32.5257	0.5976
						19.9754	0.4467					32.7885	0.5976
						20.2382	0.4467					32.8214	0.5976
						20.3696	0.4467					33.2485	0.5863
						21.2567	0.4467					33.3799	0.5863
						21.2895	0.4331					33.4127	0.5863
						21.5524	0.4331					33.5113	0.5863
						21.7166	0.4331					34.1027	0.5863
						21.8809	0.4331					34.2998	0.5863
						23.0965	0.4182					34.6612	0.5863
						23.1622	0.4182					34.7926	0.5863
						23.5565	0.4027					36.6653	0.5863
						23.9507	0.3872					36.7639	0.5863
						25.462	0.3872					37.1581	0.5863
						25.6591	0.3711					37.5195	0.5863
						26.2505	0.3711					37.6181	0.5863
						27.3676	0.3711					39.4579	0.5863
						27.4661	0.3711					40.5421	0.5863
						27.6304	0.3525					40.9692	0.5863
						28.3532	0.3525					41.4292	0.57
						29.306	0.3318					41.5606	0.57
						29.5688	0.3318					42.0534	0.57
						30.6201	0.3081					42.2505	0.57
						30.883	0.3081					42.2834	0.57
						32.23	0.3081					42.5133	0.57
						32.46	0.3081					42.9076	0.57
						38.8337	0.3081					42.9733	0.57
						41.1335	0.3081					43.9918	0.57
						43.4333	0.3081					44.2218	0.57
						45.7659	0.3081					44.7803	0.57
						45.9302	0.2567					45.2402	0.5472
						49.7413	0.2567					45.963	0.5472
												46.423	0.5472
												46.9487	0.5472
												48.1314	0.5472
												49.4784	0.5472
												50.1355	0.5472
												50.2669	0.5472
#VALUE!	--------------------

## Sheet: Figure 2F
No treatment			Radiation only			Chemotherapy only			All radiation & chemotherapy combinations
months	survival		months	survival		months	survival		months	survival
0.197125	1		0	1		0	1		0.394251	1
0.262834	1		0.854209	0.9643		0.657084	0.9883		0.919918	0.9974
0.427105	0.9821		1.1499	0.9643		0.755647	0.9883		1.60986	0.9974
0.492813	0.9643		2.79261	0.9643		0.788501	0.9883		1.97125	0.9974
0.525667	0.9464		5.28953	0.9643		0.919918	0.9883		2.26694	0.9974
0.62423	0.9464		5.38809	0.9643		0.952772	0.9823		2.56263	0.9974
0.755647	0.91		6.99795	0.9224		1.01848	0.9823		2.59548	0.9974
0.919918	0.8918		10.0862	0.9224		1.08419	0.9823		3.0883	0.9948
0.952772	0.8736		10.2834	0.9224		1.11704	0.9823		3.12115	0.9921
1.01848	0.8554		10.6448	0.8762		1.18275	0.9762		3.21971	0.9869
1.11704	0.8372		11.8275	0.8762		1.31417	0.9762		3.25257	0.9869
1.31417	0.819		11.9918	0.8276		1.41273	0.9762		3.38398	0.9869
1.51129	0.8008		14.3901	0.7789		1.44559	0.9762		3.74538	0.9842
1.54415	0.8008		15.0144	0.7302		1.577	0.9762		3.81109	0.9816
1.577	0.7822		17.1828	0.7302		1.60986	0.9762		3.97536	0.9789
1.74127	0.7636		17.3799	0.678		1.67556	0.9762		4.10678	0.9763
2.26694	0.745		17.7413	0.6259		1.83984	0.9762		4.23819	0.9763
2.29979	0.7263		18.6612	0.5737		1.87269	0.9762		4.56674	0.9763
2.43121	0.7077		19.5483	0.5737		1.90554	0.9697		4.73101	0.9763
2.46407	0.6891		19.8439	0.5164		2.00411	0.9632		4.79671	0.9763
2.52977	0.6705		20.4682	0.459		2.06982	0.9632		4.86242	0.9763
3.02259	0.6518		22.8008	0.4016		2.10267	0.9632		4.99384	0.9763
3.05544	0.6146		23.6879	0.4016		2.20123	0.9566		5.05955	0.9736
3.18686	0.596		27.729	0.3347		2.33265	0.95		5.35524	0.9736
3.38398	0.5773		29.8973	0.3347		2.46407	0.95		5.58522	0.9736
3.5154	0.5587		30.0616	0.251		2.49692	0.9433		5.61807	0.9736
3.8768	0.5401		38.5708	0.251		2.59548	0.9433		5.65092	0.9736
4.59959	0.5215		39.5893	0.1255		2.62834	0.9365		5.84805	0.9709
4.89528	0.5028					2.75975	0.9365		6.27515	0.9681
5.02669	0.4842					2.79261	0.9297		6.47228	0.9681
5.05955	0.4656					2.85832	0.9297		6.50513	0.9681
5.38809	0.447					2.89117	0.9297		6.6694	0.9654
5.4538	0.4283					2.98973	0.9297		7.35934	0.9654
5.61807	0.4283					3.05544	0.9297		7.49076	0.9627
5.71663	0.4089					3.154	0.9227		7.58932	0.9599
5.94661	0.3894					3.35113	0.9156		7.62218	0.9572
6.6037	0.3699					3.41684	0.9156		7.65503	0.9572
7.29363	0.3505					3.44969	0.9085		8.01643	0.9572
7.49076	0.331					3.48255	0.9085		8.24641	0.9544
7.62218	0.331					3.54825	0.9085		8.27926	0.9544
9.19918	0.3103					3.77823	0.8941		8.73922	0.9544
9.46201	0.2896					3.8768	0.8941		8.90349	0.946
9.7577	0.2689					4.00821	0.8941		9.00205	0.9432
10.2177	0.2482					4.13963	0.8868		9.06776	0.9432
10.7762	0.2276					4.20534	0.8868		9.23203	0.9432
11.6632	0.2276					4.3039	0.8793		9.46201	0.9404
13.4045	0.2048					4.36961	0.8793		9.56057	0.9404
13.4374	0.2048					4.40246	0.8718		9.62628	0.9376
14.4887	0.1792					4.63244	0.8718		9.69199	0.9347
15.4743	0.1536					4.73101	0.8642		9.79055	0.9319
18.2012	0.128					5.0924	0.8566		10.0205	0.9291
21.2567	0.1024					5.19097	0.8491		10.0862	0.9291
23.4908	0.0768					5.22382	0.8491		10.2177	0.9263
25.5934	0.0512					5.25667	0.8491		10.2505	0.9234
27.5647	0.0256					5.4538	0.8491		10.4805	0.9206
34.8255	0					5.48665	0.8413		10.5791	0.9177
						5.68378	0.8413		10.7433	0.9177
						5.84805	0.8333		10.9076	0.9177
						5.94661	0.8333		11.0719	0.9177
						6.01232	0.8252		11.1704	0.9177
						6.07803	0.8171		11.4333	0.9148
						6.14374	0.8171		11.4661	0.9148
						6.30801	0.809		11.499	0.9148
						6.34086	0.8007		11.8932	0.9148
						6.37372	0.8007		12.1561	0.9148
						6.47228	0.7924		12.1889	0.9119
						6.63655	0.7924		12.2546	0.9119
						6.83368	0.7924		12.4517	0.909
						6.86653	0.7924		12.6489	0.906
						7.16222	0.7837		12.6817	0.9031
						7.3922	0.7749		13.0103	0.9001
						7.45791	0.7661		13.2074	0.8972
						7.72074	0.7661		13.2731	0.8942
						7.78645	0.7572		13.6016	0.8942
						7.8193	0.7482		13.6674	0.8913
						7.85216	0.7393		13.8973	0.8853
						7.98357	0.7304		13.963	0.8853
						8.01643	0.7215		14.0287	0.8853
						8.04928	0.7037		14.0616	0.8853
						8.31211	0.6948		14.1602	0.8823
						8.41068	0.6948		14.2259	0.8793
						8.93634	0.6858		14.3573	0.8793
						9.03491	0.6858		14.5544	0.8793
						9.10062	0.6766		14.6201	0.8793
						9.23203	0.6766		14.7844	0.8763
						9.26489	0.6674		14.883	0.8763
						9.46201	0.6581		14.9158	0.8732
						9.49487	0.6581		15.0144	0.8732
						10.0862	0.6487		15.0801	0.8702
						10.2834	0.6487		15.1129	0.8702
						10.6776	0.6392		15.1786	0.8671
						11.039	0.6296		15.2772	0.864
						11.2361	0.6201		15.3101	0.8609
						11.5647	0.6105		15.54	0.8578
						11.729	0.601		15.5729	0.8578
						11.8275	0.601		15.7043	0.8516
						12.5503	0.601		15.7372	0.8485
						12.846	0.601		15.8357	0.8485
						14.0945	0.591		15.9014	0.8485
						14.2259	0.581		16.0329	0.8453
						14.5873	0.5709		16.3614	0.8422
						14.653	0.5609		16.5585	0.839
						14.7187	0.5509		16.6899	0.8359
						14.8501	0.5409		16.7556	0.8328
						14.883	0.5309		16.7885	0.8328
						14.9487	0.5309		16.8542	0.8328
						14.9815	0.5207		17.0185	0.8296
						15.7372	0.5105		17.117	0.8264
						15.8029	0.5003		17.2156	0.8264
						16.1971	0.49		17.2813	0.8264
						17.2156	0.49		17.3142	0.8232
						17.7413	0.4796		17.4456	0.8232
						18.1027	0.4796		17.4784	0.82
						18.1355	0.4796		17.5113	0.8168
						18.2012	0.4687		17.7413	0.8136
						18.2341	0.4578		17.8727	0.8104
						18.4969	0.4578		17.9384	0.8104
						18.5626	0.4467		18.1355	0.8104
						18.924	0.4467		18.3326	0.8071
						18.9569	0.4467		18.3984	0.8039
						19.5811	0.4467		18.5298	0.8039
						19.9754	0.4467		18.5955	0.8039
						20.2382	0.4467		18.6612	0.8006
						20.3696	0.4467		18.9569	0.7941
						21.2567	0.4467		19.2526	0.7941
						21.2895	0.4331		19.7454	0.7908
						21.5524	0.4331		20.0082	0.7875
						21.7166	0.4331		20.1068	0.7875
						21.8809	0.4331		20.271	0.7842
						23.0965	0.4182		20.3039	0.7842
						23.1622	0.4182		20.4025	0.7809
						23.5565	0.4027		20.4682	0.7776
						23.9507	0.3872		20.7639	0.7776
						25.462	0.3872		20.9938	0.7742
						25.6591	0.3711		21.0267	0.7708
						26.2505	0.3711		21.0595	0.7708
						27.3676	0.3711		21.1581	0.7674
						27.4661	0.3711		21.191	0.7674
						27.6304	0.3525		21.3224	0.7641
						28.3532	0.3525		21.4867	0.7607
						29.306	0.3318		21.5195	0.7607
						29.5688	0.3318		21.9466	0.7572
						30.6201	0.3081		22.078	0.7538
						30.883	0.3081		22.1766	0.7504
						32.23	0.3081		22.5051	0.747
						32.46	0.3081		22.6037	0.747
						38.8337	0.3081		22.7023	0.747
						41.1335	0.3081		22.8008	0.7435
						43.4333	0.3081		22.8994	0.7401
						45.7659	0.3081		22.9979	0.7366
						45.9302	0.2567		23.1951	0.7331
						49.7413	0.2567		23.3922	0.7331
									23.7207	0.7331
									23.7536	0.7295
									23.7864	0.726
									23.9507	0.7224
									24.115	0.7189
									24.1807	0.7189
									24.6407	0.7189
									24.7392	0.7153
									24.8049	0.7153
									24.8378	0.7117
									24.9692	0.7117
									25.1006	0.7044
									25.1992	0.7044
									25.232	0.7044
									25.3306	0.7044
									25.7577	0.7044
									25.7906	0.7007
									26.0862	0.7007
									26.1191	0.6969
									26.2177	0.6969
									26.2834	0.6932
									26.3162	0.6932
									26.3819	0.6932
									26.4148	0.6932
									26.5133	0.6932
									26.5462	0.6893
									26.7762	0.6854
									26.8419	0.6815
									26.9733	0.6775
									27.1047	0.6775
									27.2361	0.6775
									27.269	0.6775
									27.3018	0.6735
									27.3347	0.6694
									27.4004	0.6694
									27.4661	0.6653
									27.5647	0.6653
									27.6632	0.6653
									27.6961	0.6612
									27.8932	0.6612
									27.9261	0.6612
									27.9589	0.6612
									28.2875	0.6612
									28.4517	0.6612
									28.6817	0.6612
									28.8131	0.6612
									28.9117	0.6612
									29.076	0.6567
									29.1745	0.6523
									29.5031	0.6523
									29.5359	0.6523
									29.8316	0.6477
									30.1273	0.6477
									30.193	0.6432
									30.2587	0.6386
									30.423	0.6386
									30.4887	0.634
									30.7844	0.6294
									30.8172	0.6294
									31.0472	0.6294
									31.0801	0.6248
									31.2115	0.6248
									31.2772	0.6248
									31.54	0.62
									31.5729	0.6153
									31.8686	0.6153
									31.9014	0.6153
									32.1643	0.6153
									32.23	0.6104
									32.3943	0.6056
									32.5257	0.6056
									32.5585	0.6007
									32.6571	0.6007
									32.7885	0.6007
									32.8214	0.6007
									33.0185	0.6007
									33.2485	0.5956
									33.3799	0.5956
									33.4127	0.5956
									33.5113	0.5956
									33.9713	0.5956
									34.0041	0.5903
									34.1027	0.5903
									34.2998	0.5903
									34.6612	0.5903
									34.7926	0.5903
									35.5154	0.5903
									35.9754	0.5903
									36.4682	0.5903
									36.6653	0.5903
									36.7639	0.5903
									37.1581	0.5903
									37.2238	0.5903
									37.5195	0.5903
									37.5852	0.5843
									37.6181	0.5843
									37.848	0.5782
									39.2608	0.5782
									39.4579	0.5782
									40.5421	0.5782
									40.9035	0.5782
									40.9692	0.5782
									41.1663	0.5782
									41.4292	0.5716
									41.5606	0.5716
									42.0534	0.5716
									42.2505	0.5716
									42.2834	0.5716
									42.5133	0.5716
									42.9076	0.5716
									42.9733	0.5716
									43.3347	0.5716
									43.7618	0.5644
									43.9918	0.5644
									44.2218	0.5644
									44.7803	0.5644
									45.2402	0.5569
									45.7002	0.5569
									45.8316	0.5569
									45.963	0.5569
									46.423	0.5569
									46.9487	0.5569
									47.77	0.5569
									48.1314	0.5569
									48.6242	0.5569
									48.7228	0.5569
									48.9528	0.5569
									49.4784	0.5569
									49.9713	0.5569
									50.1355	0.5569
									50.2341	0.5569
									50.2669	0.5569
									50.5298	0.5569
									51.1869	0.5569
									51.2526	0.5569
									51.2854	0.5569
									51.9425	0.5569
									52.0739	0.5569
									52.6653	0.5569
									52.7967	0.5569
									53.5852	0.5569
									54.308	0.5569
									54.8008	0.5569
									55.2279	0.5569
									55.4251	0.5569
									55.8522	0.5569
									56.5749	0.5569
									57.0349	0.5569
									57.462	0.5569
									59.3676	0.5569
									59.6632	0.5569
									60.0575	0.5569
									60.8789	0.5569
									61.1417	0.5569
									62.2916	0.5569
									62.5216	0.5569
									62.5544	0.5569
									63.8357	0.5569
									64.3614	0.5569
									65.0842	0.5569
									65.2485	0.5569
									65.5113	0.5569
									66.6612	0.5569
									68.0739	0.5569
									68.8624	0.5569
									69.191	0.5569
									70.1766	0.5569
									70.6694	0.5569
									71.5565	0.5569
									72.2136	0.5569
									72.4764	0.5569
									73.3306	0.5569
									73.8234	0.5569
									75.3018	0.5569
									77.2731	0.5569
									77.5031	0.5569
									79.4415	0.5569
									80.1971	0.5569
									81.6427	0.5569
									82.8255	0.5569
									83.4168	0.5569
									83.8768	0.5569
									84.5996	0.5569
									87.2279	0.5569
									90.5133	0.5569
									90.8419	0.5569
									97.8398	0.5569
									115.91	0.5569
									132.008	0.5569
									134.604	0.5569
#VALUE!	--------------------

## Sheet: Figure 3
months	Actual survival		months	Predicted survival
0.0985626	1		0.328542	0.998533
0.131417	1		0.657084	0.994289
0.164271	1		0.985626	0.988545
0.197125	1		1.31417	0.981964
0.229979	1		1.64271	0.974889
0.262834	1		1.97125	0.967517
0.295688	1		2.29979	0.95997
0.361396	1		2.62834	0.952327
0.394251	1		2.95688	0.944643
0.427105	0.9986		3.28542	0.936954
0.459959	0.9986		3.61396	0.929289
0.492813	0.9972		3.94251	0.921667
0.525667	0.9958		4.27105	0.914102
0.558522	0.9958		4.59959	0.906605
0.591376	0.9958		4.92813	0.899183
0.62423	0.9958		5.25667	0.891842
0.657084	0.993		5.58522	0.884587
0.722793	0.993		5.91376	0.87742
0.755647	0.9901		6.2423	0.870342
0.788501	0.9901		6.57084	0.863356
0.821355	0.9901		6.89938	0.856461
0.854209	0.9887		7.22793	0.849657
0.887064	0.9887		7.55647	0.842946
0.919918	0.9857		7.88501	0.836325
0.952772	0.9827		8.21355	0.829794
1.01848	0.9813		8.54209	0.823353
1.05133	0.9813		8.87064	0.816999
1.08419	0.9813		9.19918	0.810733
1.11704	0.9798		9.52772	0.804553
1.1499	0.9798		9.85626	0.798457
1.18275	0.9783		10.1848	0.792444
1.21561	0.9783		10.5133	0.786513
1.31417	0.9768		10.8419	0.780663
1.41273	0.9768		11.1704	0.774892
1.44559	0.9768		11.499	0.769198
1.47844	0.9768		11.8275	0.76358
1.51129	0.9752		12.1561	0.758038
1.54415	0.9752		12.4846	0.752568
1.577	0.9737		12.8131	0.747171
1.60986	0.9737		13.1417	0.741845
1.67556	0.9737		13.4702	0.736588
1.74127	0.9722		13.7988	0.7314
1.77413	0.9722		14.1273	0.726278
1.83984	0.9722		14.4559	0.721222
1.87269	0.9722		14.7844	0.71623
1.90554	0.9706		15.1129	0.711302
1.97125	0.9706		15.4415	0.706435
2.00411	0.9691		15.77	0.70163
2.06982	0.9691		16.0986	0.696884
2.10267	0.9691		16.4271	0.692196
2.16838	0.9691		16.7556	0.687567
2.20123	0.9675		17.0842	0.682993
2.26694	0.9659		17.4127	0.678476
2.29979	0.9644		17.7413	0.674012
2.33265	0.9628		18.0698	0.669602
2.3655	0.9628		18.3984	0.665245
2.39836	0.9628		18.7269	0.660938
2.43121	0.9612		19.0554	0.656683
2.46407	0.9597		19.384	0.652477
2.49692	0.9581		19.7125	0.64832
2.52977	0.9565		20.0411	0.644211
2.56263	0.9565		20.3696	0.640149
2.59548	0.9565		20.6982	0.636134
2.62834	0.9549		21.0267	0.632164
2.7269	0.9549		21.3552	0.628238
2.75975	0.9549		21.6838	0.624357
2.79261	0.9533		22.0123	0.620518
2.85832	0.9533		22.3409	0.616722
2.89117	0.9533		22.6694	0.612968
2.98973	0.9533		22.9979	0.609255
3.02259	0.9517		23.3265	0.605582
3.05544	0.9485		23.655	0.601949
3.0883	0.9469		23.9836	0.598355
3.12115	0.9453		24.3121	0.594799
3.154	0.9436		24.6407	0.591281
3.18686	0.942		24.9692	0.5878
3.21971	0.9388		25.2977	0.584356
3.25257	0.9388		25.6263	0.580948
3.35113	0.9372		25.9548	0.577575
3.38398	0.9356		26.2834	0.574237
3.41684	0.9356		26.6119	0.570933
3.44969	0.9339		26.9405	0.567662
3.48255	0.9339		27.269	0.564426
3.5154	0.9323		27.5975	0.561221
3.54825	0.9323		27.9261	0.558049
3.71253	0.9323		28.2546	0.554909
3.74538	0.9307		28.5832	0.5518
3.77823	0.9274		28.9117	0.548721
3.81109	0.9258		29.2402	0.545673
3.8768	0.9241		29.5688	0.542655
3.90965	0.9241		29.8973	0.539666
3.97536	0.9225		30.2259	0.536706
4.00821	0.9225		30.5544	0.533775
4.10678	0.9208		30.883	0.530872
4.13963	0.9192		31.2115	0.527996
4.20534	0.9192		31.54	0.525148
4.23819	0.9192		31.8686	0.522327
4.3039	0.9175		32.1971	0.519532
4.36961	0.9175		32.5257	0.516763
4.40246	0.9159		32.8542	0.51402
4.56674	0.9159		33.1828	0.511303
4.59959	0.9142		33.5113	0.50861
4.63244	0.9142		33.8398	0.505942
4.6653	0.9142		34.1684	0.503299
4.73101	0.9126		34.4969	0.50068
4.76386	0.9126		34.8255	0.498084
4.79671	0.9126		35.154	0.495512
4.86242	0.9126		35.4825	0.492962
4.89528	0.9109		35.8111	0.490436
4.99384	0.9109		36.1396	0.487932
5.02669	0.9092		36.4682	0.48545
5.05955	0.9058		36.7967	0.48299
5.0924	0.9042		37.1253	0.480551
5.19097	0.9025		37.4538	0.478134
5.22382	0.9025		37.7823	0.475738
5.25667	0.9025		38.1109	0.473362
5.28953	0.9025		38.4394	0.471007
5.35524	0.9025		38.768	0.468672
5.38809	0.9008		39.0965	0.466357
5.4538	0.8991		39.4251	0.464062
5.48665	0.8974		39.7536	0.461786
5.58522	0.8974		40.0821	0.459529
5.61807	0.8974		40.4107	0.457291
5.65092	0.8974		40.7392	0.455072
5.68378	0.8974		41.0678	0.452871
5.71663	0.8957		41.3963	0.450688
5.84805	0.8922		41.7248	0.448524
5.94661	0.8905		42.0534	0.446377
6.01232	0.8888		42.3819	0.444248
6.07803	0.887		42.7105	0.442136
6.14374	0.887		43.039	0.440041
6.20945	0.887		43.3676	0.437964
6.27515	0.8853		43.6961	0.435902
6.30801	0.8836		44.0246	0.433858
6.34086	0.8818		44.3532	0.43183
6.37372	0.8818		44.6817	0.429818
6.47228	0.8801		45.0103	0.427821
6.50513	0.8801		45.3388	0.425841
6.6037	0.8783		45.6674	0.423876
6.63655	0.8783		45.9959	0.421927
6.6694	0.8766		46.3244	0.419992
6.83368	0.8766		46.653	0.418073
6.86653	0.8766		46.9815	0.416169
6.99795	0.8748		47.3101	0.414279
7.16222	0.873		47.6386	0.412404
7.29363	0.8713		47.9671	0.410543
7.35934	0.8713		48.2957	0.408696
7.3922	0.8695		48.6242	0.406863
7.45791	0.8677		48.9528	0.405044
7.49076	0.8642		49.2813	0.403239
7.58932	0.8624		49.6099	0.401448
7.62218	0.8606		49.9384	0.39967
7.65503	0.8606		50.2669	0.397905
7.72074	0.8606		50.5955	0.396153
7.78645	0.8588		50.924	0.394414
7.8193	0.857		51.2526	0.392688
7.85216	0.8552		51.5811	0.390975
7.98357	0.8535		51.9097	0.389274
8.01643	0.8517		52.2382	0.387586
8.04928	0.8481		52.5667	0.38591
8.24641	0.8463		52.8953	0.384246
8.27926	0.8463		53.2238	0.382594
8.31211	0.8445		53.5524	0.380954
8.41068	0.8445		53.8809	0.379325
8.73922	0.8445		54.2094	0.377709
8.90349	0.8391		54.538	0.376104
8.93634	0.8372		54.8665	0.37451
9.00205	0.8354		55.1951	0.372927
9.03491	0.8354		55.5236	0.371356
9.06776	0.8354		55.8522	0.369796
9.10062	0.8336		56.1807	0.368246
9.19918	0.8318		56.5092	0.366708
9.23203	0.8318		56.8378	0.36518
9.26489	0.83		57.1663	0.363663
9.46201	0.8245		57.4949	0.362156
9.49487	0.8245		57.8234	0.36066
9.56057	0.8245		58.152	0.359173
9.62628	0.8226		58.4805	0.357698
9.69199	0.8208		58.809	0.356232
9.7577	0.819		59.1376	0.354776
9.79055	0.8171		59.4661	0.35333
10.0205	0.8153		59.7947	0.351893
10.0862	0.8135		60.1232	0.350467
10.2177	0.8098		60.4517	0.34905
10.2505	0.8079		60.7803	0.347642
10.2834	0.8079		61.1088	0.346244
10.4805	0.806		61.4374	0.344855
10.5791	0.8042		61.7659	0.343475
10.6448	0.8023		62.0945	0.342105
10.6776	0.8004		62.423	0.340743
10.7433	0.8004
10.7762	0.7986
10.9076	0.7986
11.039	0.7967
11.0719	0.7967
11.1704	0.7967
11.2361	0.7948
11.4333	0.7929
11.4661	0.7929
11.499	0.7929
11.5647	0.791
11.6632	0.791
11.729	0.7891
11.8275	0.7891
11.8932	0.7891
11.9918	0.7872
12.1561	0.7872
12.1889	0.7853
12.2546	0.7853
12.2875	0.7853
12.4517	0.7834
12.5503	0.7834
12.6489	0.7814
12.6817	0.7795
12.7146	0.7795
12.846	0.7795
12.8789	0.7795
13.0103	0.7776
13.2074	0.7756
13.2731	0.7736
13.4045	0.7717
13.4374	0.7717
13.6016	0.7717
13.6674	0.7697
13.8973	0.7658
13.963	0.7658
14.0287	0.7658
14.0616	0.7658
14.0945	0.7638
14.1602	0.7618
14.2259	0.7578
14.3573	0.7578
14.3901	0.7558
14.4887	0.7538
14.5544	0.7538
14.5873	0.7518
14.6201	0.7518
14.653	0.7498
14.7187	0.7478
14.7844	0.7458
14.8501	0.7438
14.883	0.7418
14.9158	0.7398
14.9487	0.7398
14.9815	0.7377
15.0144	0.7357
15.0801	0.7337
15.1129	0.7337
15.1786	0.7317
15.2772	0.7296
15.3101	0.7276
15.4743	0.7255
15.54	0.7235
15.5729	0.7235
15.7043	0.7194
15.7372	0.7153
15.8029	0.7132
15.8357	0.7132
15.9014	0.7132
16.0329	0.7112
16.1314	0.7112
16.1971	0.7091
16.3614	0.707
16.5585	0.705
16.6899	0.7029
16.7556	0.7008
16.7885	0.7008
16.8542	0.7008
17.0185	0.6987
17.117	0.6966
17.1828	0.6966
17.2156	0.6966
17.2813	0.6966
17.3142	0.6945
17.3799	0.6924
17.4456	0.6924
17.4784	0.6903
17.5113	0.6882
17.7413	0.6818
17.8727	0.6797
17.9384	0.6797
18.1027	0.6797
18.1355	0.6797
18.2012	0.6754
18.2341	0.6732
18.3326	0.6711
18.3984	0.6689
18.4969	0.6689
18.5298	0.6689
18.5626	0.6667
18.5955	0.6667
18.6612	0.6624
18.924	0.6624
18.9569	0.658
19.2526	0.658
19.5483	0.658
19.5811	0.658
19.7454	0.6558
19.8439	0.6536
19.9754	0.6536
20.0082	0.6514
20.1068	0.6514
20.2382	0.6514
20.271	0.6492
20.3039	0.6492
20.3696	0.6492
20.4025	0.6469
20.4682	0.6424
20.7639	0.6424
20.9938	0.6401
21.0267	0.6378
21.0595	0.6378
21.1581	0.6355
21.191	0.6355
21.2567	0.6332
21.2895	0.6309
21.3224	0.6286
21.4867	0.6263
21.5195	0.6263
21.5524	0.6263
21.7166	0.6263
21.8809	0.6263
21.9466	0.6239
22.078	0.6216
22.1766	0.6192
22.5051	0.6169
22.6037	0.6169
22.7023	0.6169
22.8008	0.6121
22.8994	0.6097
22.9979	0.6074
23.0965	0.605
23.1622	0.605
23.1951	0.6026
23.3922	0.6026
23.4908	0.6002
23.5565	0.5977
23.6879	0.5977
23.7207	0.5977
23.7536	0.5953
23.7864	0.5929
23.9507	0.588
24.115	0.5855
24.1807	0.5855
24.6407	0.5855
24.7392	0.583
24.8049	0.583
24.8378	0.5806
24.9692	0.5806
25.1006	0.5756
25.1992	0.5756
25.232	0.5756
25.3306	0.5756
25.462	0.5756
25.5934	0.573
25.6591	0.5705
25.7577	0.5705
25.7906	0.5679
26.0862	0.5679
26.1191	0.5654
26.2177	0.5654
26.2505	0.5654
26.2834	0.5628
26.3162	0.5628
26.3819	0.5628
26.4148	0.5628
26.5133	0.5628
26.5462	0.5601
26.7762	0.5574
26.8419	0.5548
26.9733	0.5521
27.1047	0.5521
27.2361	0.5521
27.269	0.5521
27.3018	0.5493
27.3347	0.5465
27.3676	0.5465
27.4004	0.5465
27.4661	0.5437
27.5647	0.5409
27.6304	0.5381
27.6632	0.5381
27.6961	0.5352
27.729	0.5324
27.8932	0.5324
27.9261	0.5324
27.9589	0.5324
28.2875	0.5324
28.3532	0.5324
28.4517	0.5324
28.6817	0.5324
28.8131	0.5324
28.9117	0.5324
29.076	0.5294
29.1745	0.5263
29.306	0.5232
29.5031	0.5232
29.5359	0.5232
29.5688	0.5232
29.8316	0.5201
29.8973	0.5201
30.0616	0.517
30.1273	0.517
30.193	0.5138
30.2587	0.5106
30.423	0.5106
30.4887	0.5074
30.6201	0.5042
30.7844	0.501
30.8172	0.501
30.883	0.501
31.0472	0.501
31.0801	0.4978
31.2115	0.4978
31.2772	0.4978
31.54	0.4945
31.5729	0.4912
31.8686	0.4912
31.9014	0.4912
32.1643	0.4912
32.23	0.4878
32.3943	0.4844
32.46	0.4844
32.5257	0.4844
32.5585	0.481
32.6571	0.481
32.7885	0.481
32.8214	0.481
33.0185	0.481
33.2485	0.4774
33.3799	0.4774
33.4127	0.4774
33.5113	0.4774
33.9713	0.4774
34.0041	0.4737
34.1027	0.4737
34.2998	0.4737
34.6612	0.4737
34.7926	0.4737
34.8255	0.4699
35.5154	0.4699
35.9754	0.4699
36.4682	0.4699
36.6653	0.4699
36.7639	0.4699
37.1581	0.4699
37.2238	0.4699
37.5195	0.4699
37.5852	0.4658
37.6181	0.4658
37.848	0.4616
38.5708	0.4616
38.8337	0.4616
39.2608	0.4616
39.4579	0.4616
39.5893	0.4573
40.5421	0.4573
40.9035	0.4573
40.9692	0.4573
41.1335	0.4573
41.1663	0.4573
41.4292	0.4527
41.5606	0.4527
42.0534	0.4527
42.2505	0.4527
42.2834	0.4527
42.5133	0.4527
42.9076	0.4527
42.9733	0.4527
43.3347	0.4527
43.4333	0.4527
43.7618	0.4476
43.9918	0.4476
44.2218	0.4476
44.7803	0.4476
45.2402	0.4424
45.7002	0.4424
45.7659	0.4424
45.8316	0.4424
45.9302	0.437
45.963	0.437
46.423	0.437
46.9487	0.437
47.77	0.437
48.1314	0.437
48.6242	0.437
48.7228	0.437
48.9528	0.437
49.4784	0.437
49.7413	0.437
49.9713	0.437
50.1355	0.437
